# Supplementary material
Source: MDPI journal article supplement (https://www.mdpi.com/2304-6775/11/1/12)
Supplement: s1 [file s1 › publications-2089648-supplementary.pdf]

## Q1 How did you hear about IAPSS Politikon?

Answered: 36 Skipped: 0

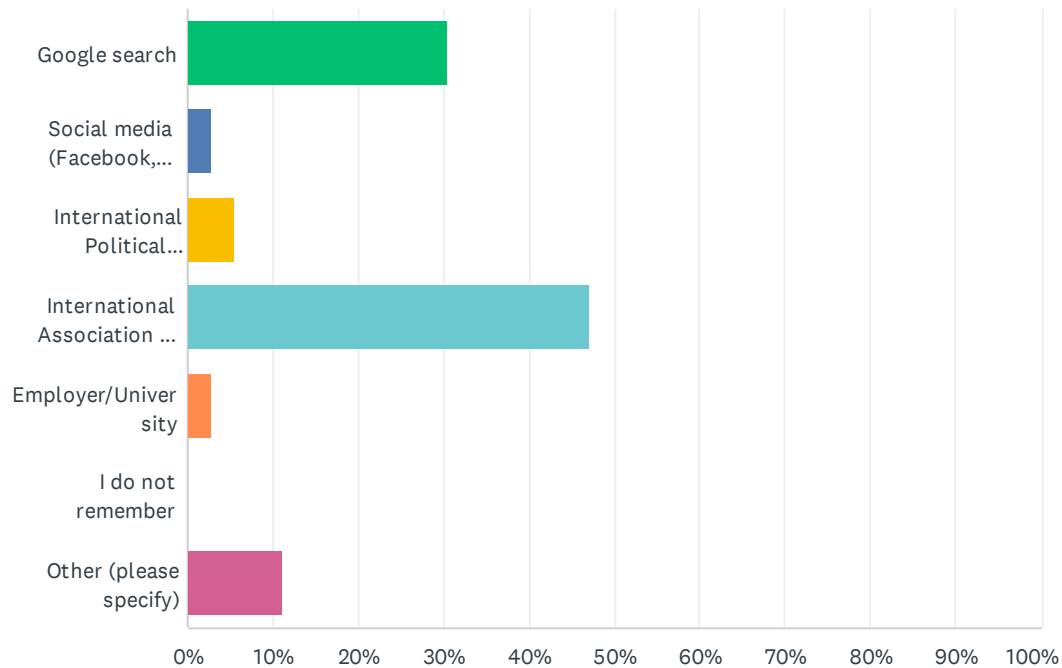

| ANSWER CHOICES                                                   | RESPONSES |    |
|------------------------------------------------------------------|-----------|----|
| Google search                                                    | 30.56%    | 11 |
| Social media (Facebook, Twitter, LinkedIn)                       | 2.78%     | 1  |
| International Political Science Association (IPSA)               | 5.56%     | 2  |
| International Association for Political Science Students (IAPSS) | 47.22%    | 17 |
| Employer/University                                              | 2.78%     | 1  |
| I do not remember                                                | 0.00%     | 0  |
| Other (please specify)                                           | 11.11%    | 4  |
| TOTAL                                                            |           | 36 |

## Q2 Which of the following best describes you?

Answered: 7 Skipped: 29

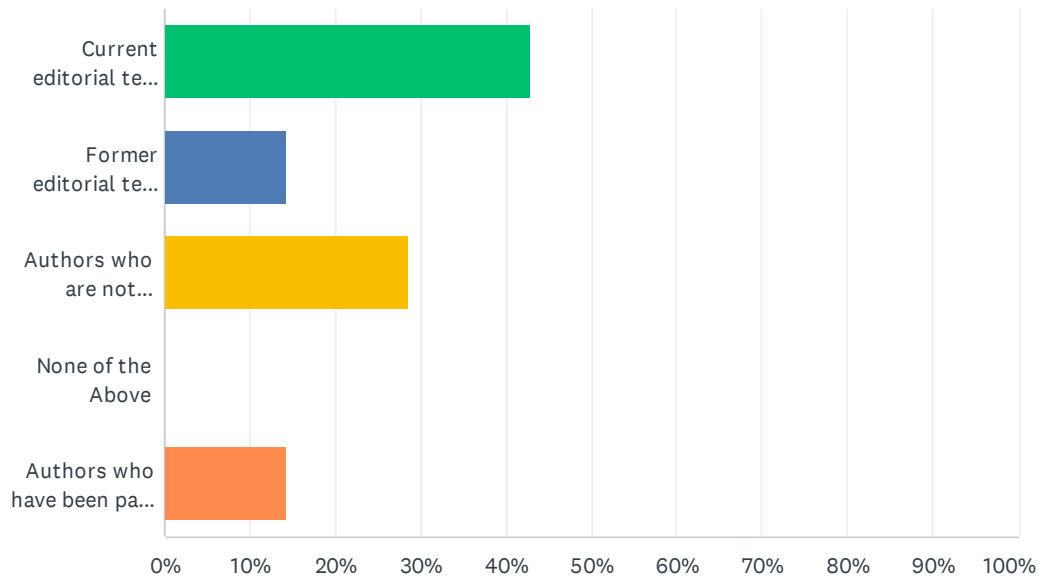

| ANSWER CHOICES                                   | RESPONSES |   |
|--------------------------------------------------|-----------|---|
| Current editorial team member                    | 42.86%    | 3 |
| Former editorial team member                     | 14.29%    | 1 |
| Authors who are not editorial team member        | 28.57%    | 2 |
| None of the Above                                | 0.00%     | 0 |
| Authors who have been part of the editorial team | 14.29%    | 1 |
| TOTAL                                            |           | 7 |

### Q3 How many manuscripts have you published in IAPSS Politikon?

Answered: 36 Skipped: 0

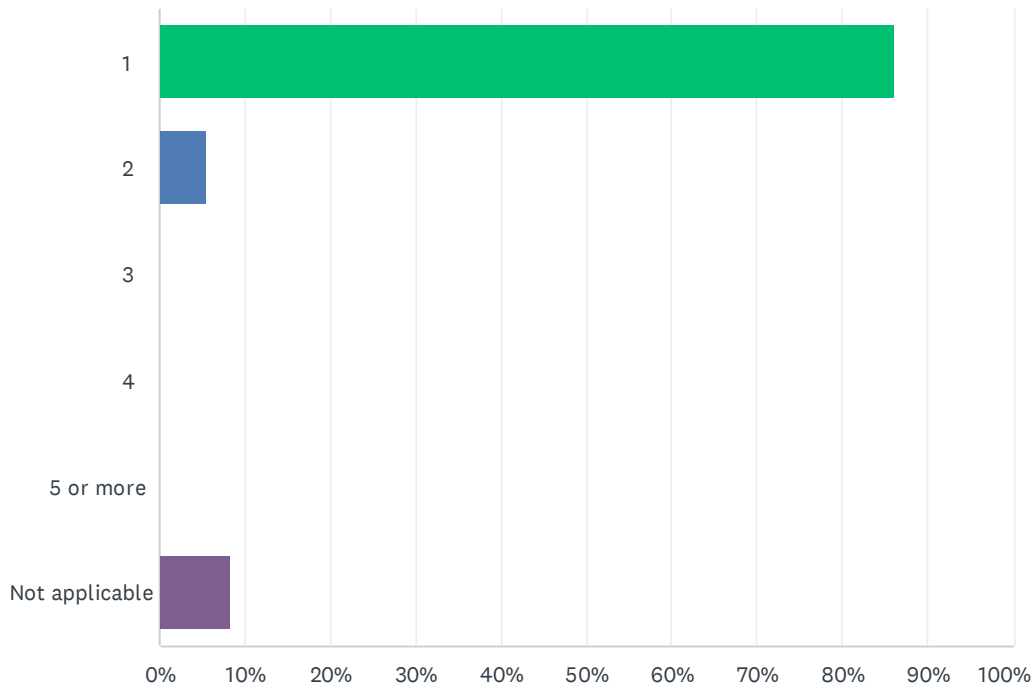

| ANSWER CHOICES | RESPONSES |    |
|----------------|-----------|----|
| 1              | 86.11%    | 31 |
| 2              | 5.56%     | 2  |
| 3              | 0.00%     | 0  |
| 4              | 0.00%     | 0  |
| 5 or more      | 0.00%     | 0  |
| Not applicable | 8.33%     | 3  |
| TOTAL          |           | 36 |

## Q4 Why did you choose to publish with IAPSS Politikon?

Answered: 36 Skipped: 0

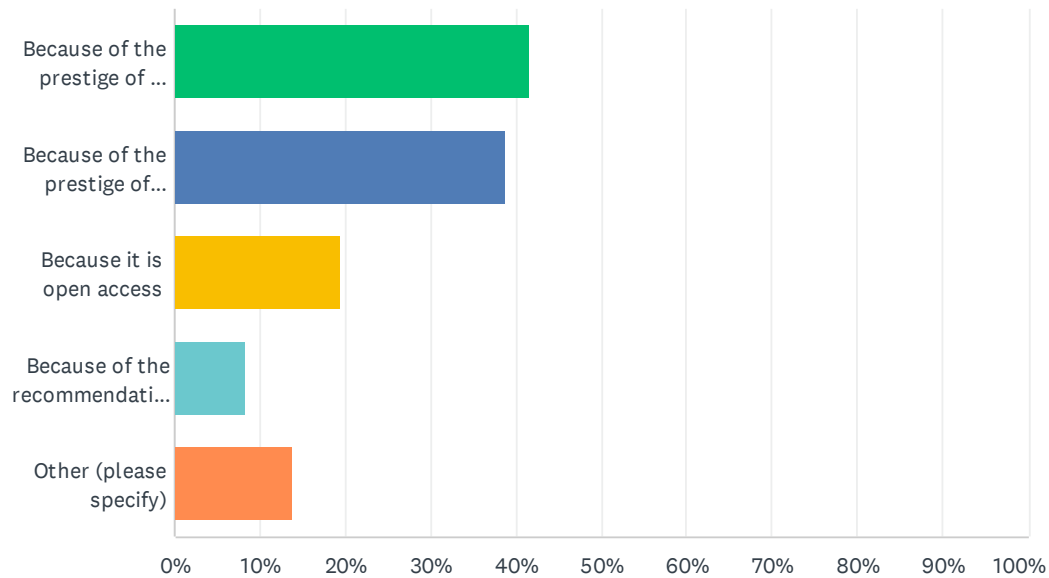

| ANSWER CHOICES                          | RESPONSES |    |
|-----------------------------------------|-----------|----|
| Because of the prestige of the journal  | 41.67%    | 15 |
| Because of the prestige of IAPSS        | 38.89%    | 14 |
| Because it is open access               | 19.44%    | 7  |
| Because of the recommendation from IPSA | 8.33%     | 3  |
| Other (please specify)                  | 13.89%    | 5  |
| Total Respondents: 36                   |           |    |

## Q5 After the submission of your manuscript, was there any correction before acceptance?

Answered: 7 Skipped: 29

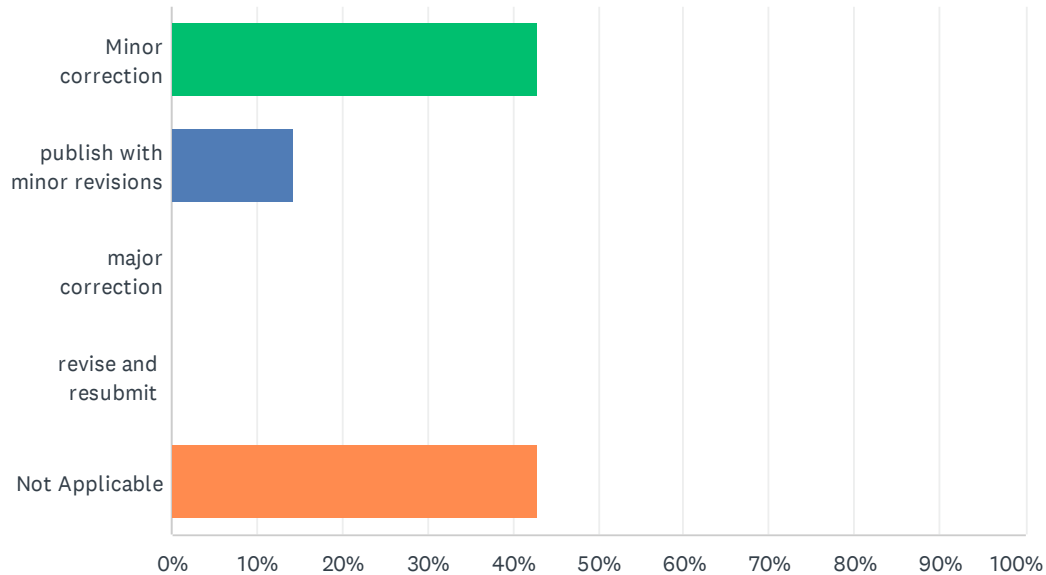

| ANSWER CHOICES               | RESPONSES |   |
|------------------------------|-----------|---|
| Minor correction             | 42.86%    | 3 |
| publish with minor revisions | 14.29%    | 1 |
| major correction             | 0.00%     | 0 |
| revise and resubmit          | 0.00%     | 0 |
| Not Applicable               | 42.86%    | 3 |
| TOTAL                        |           | 7 |

## Q6 How many manuscripts have you worked on as an editorial team member?

Answered: 7 Skipped: 29

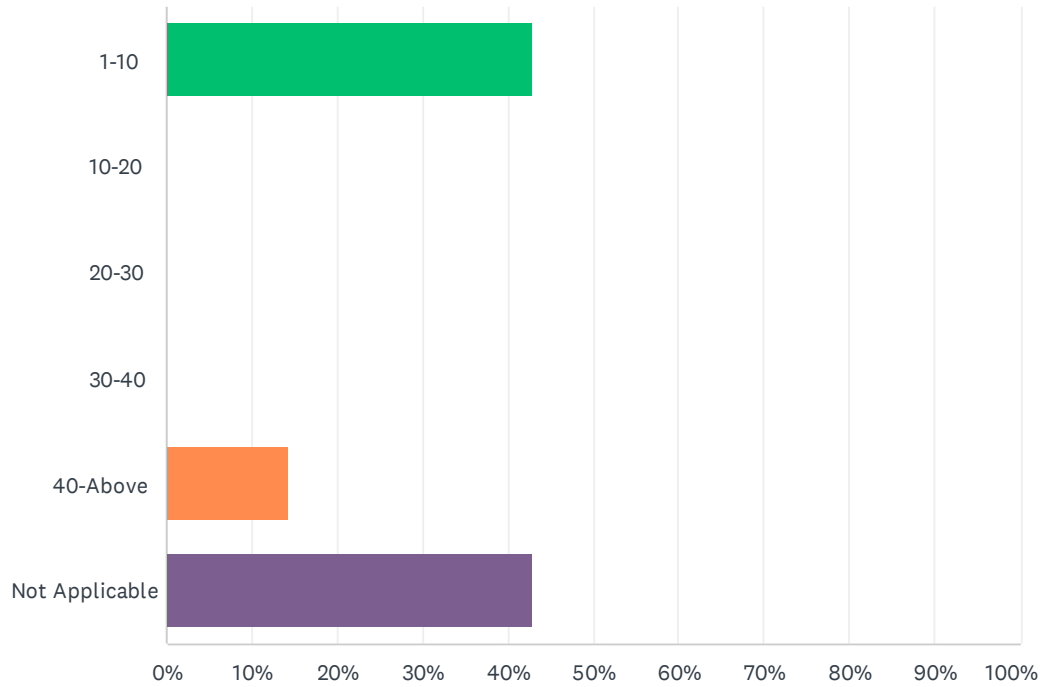

| ANSWER CHOICES | RESPONSES |   |
|----------------|-----------|---|
| 1-10           | 42.86%    | 3 |
| 10-20          | 0.00%     | 0 |
| 20-30          | 0.00%     | 0 |
| 30-40          | 0.00%     | 0 |
| 40-Above       | 14.29%    | 1 |
| Not Applicable | 42.86%    | 3 |
| TOTAL          |           | 7 |

## Q7 Since the first time you published with IAPSS Politikon, do you feel that your career as a junior scholar has improved?

Answered: 36 Skipped: 0

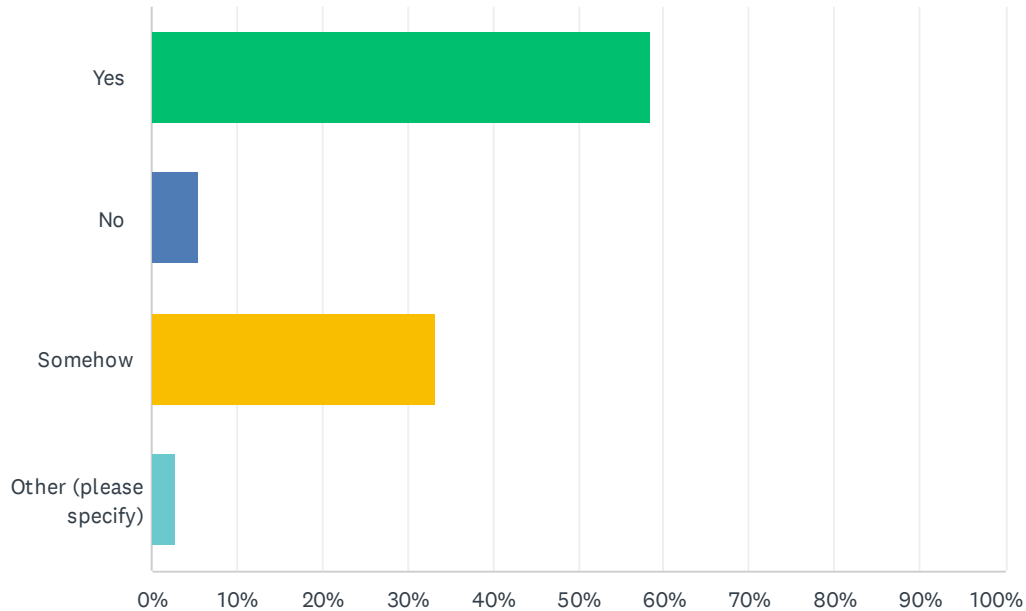

| ANSWER CHOICES         | RESPONSES |    |
|------------------------|-----------|----|
| Yes                    | 58.33%    | 21 |
| No                     | 5.56%     | 2  |
| Somehow                | 33.33%    | 12 |
| Other (please specify) | 2.78%     | 1  |
| TOTAL                  |           | 36 |

## Q8 If your answer to the previous question was "yes" or "somehow", in what ways did your career improve?

Answered: 34 Skipped: 2

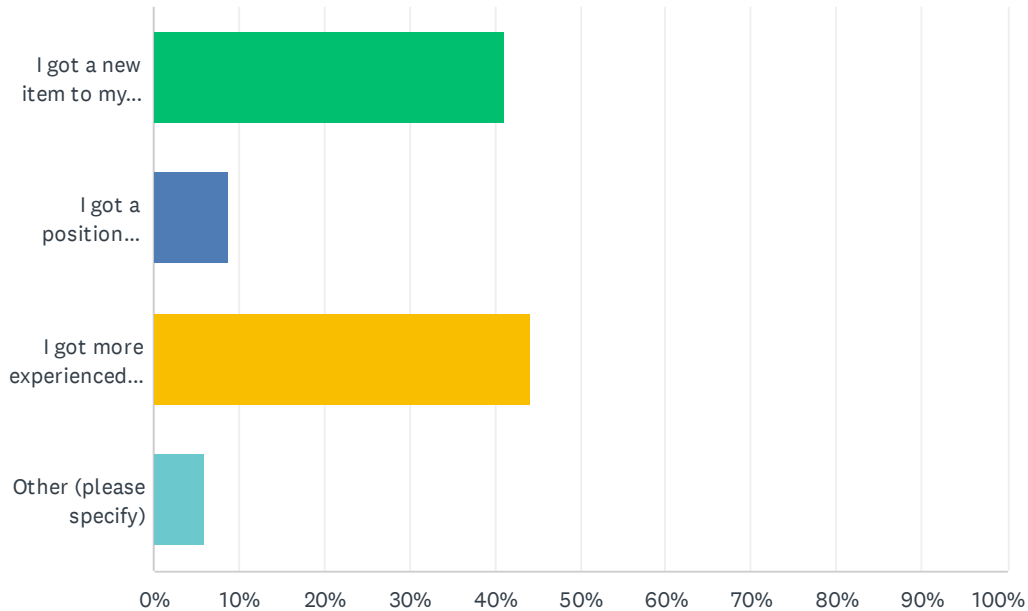

| ANSWER CHOICES                                        | RESPONSES |    |
|-------------------------------------------------------|-----------|----|
| I got a new item to my Curriculum Vitae               | 41.18%    | 14 |
| I got a position because of my number of publications | 8.82%     | 3  |
| I got more experienced with respect to publications   | 44.12%    | 15 |
| Other (please specify)                                | 5.88%     | 2  |
| TOTAL                                                 |           | 34 |

## Q9 Did you increase your educational background after publishing with Politikon?

Answered: 34 Skipped: 2

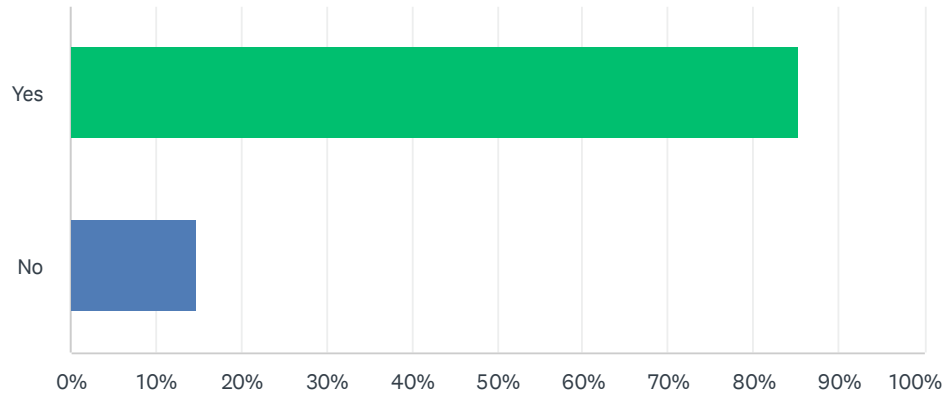

| ANSWER CHOICES |  | RESPONSES |    |
|----------------|--|-----------|----|
| Yes            |  | 85.29%    | 29 |
| No             |  | 14.71%    | 5  |
| TOTAL          |  |           | 34 |

## Q10 Did you get a higher position after publishing with Politikon?

Answered: 34 Skipped: 2

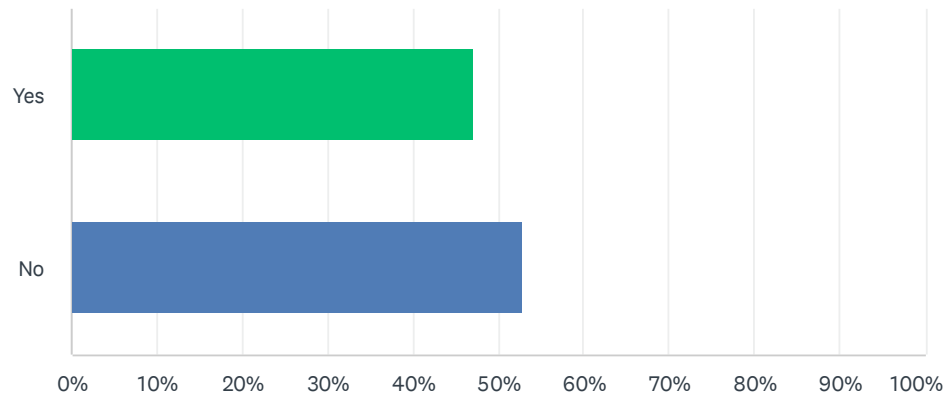

| ANSWER CHOICES |  | RESPONSES |    |
|----------------|--|-----------|----|
| Yes            |  | 47.06%    | 16 |
| No             |  | 52.94%    | 18 |
| TOTAL          |  |           | 34 |

## Q11 Do you feel that your writing/researching/reasoning skills have improved as a result of publishing with Politikon?

Answered: 34 Skipped: 2

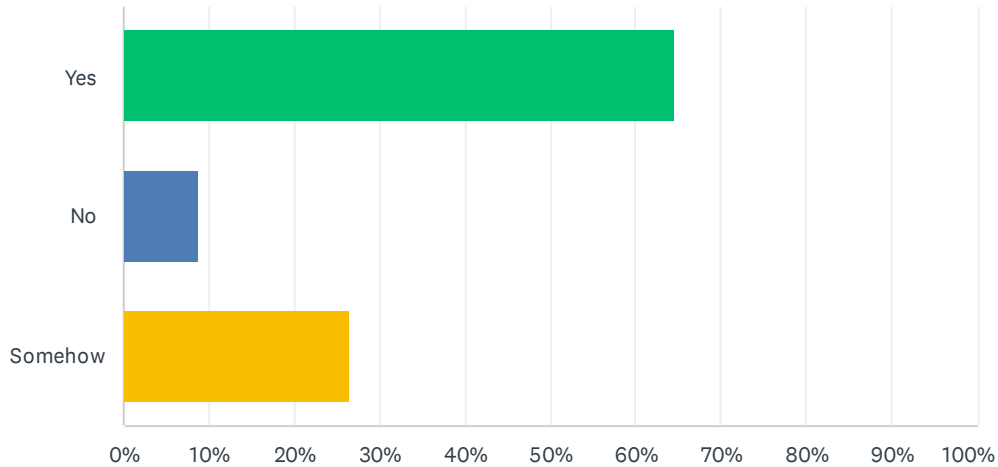

| ANSWER CHOICES | RESPONSES |    |
|----------------|-----------|----|
| Yes            | 64.71%    | 22 |
| No             | 8.82%     | 3  |
| Somehow        | 26.47%    | 9  |
| TOTAL          |           | 34 |

## Q12 Since the time you published with IAPSS Politikon, how active have you been with IAPSS?

Answered: 36 Skipped: 0

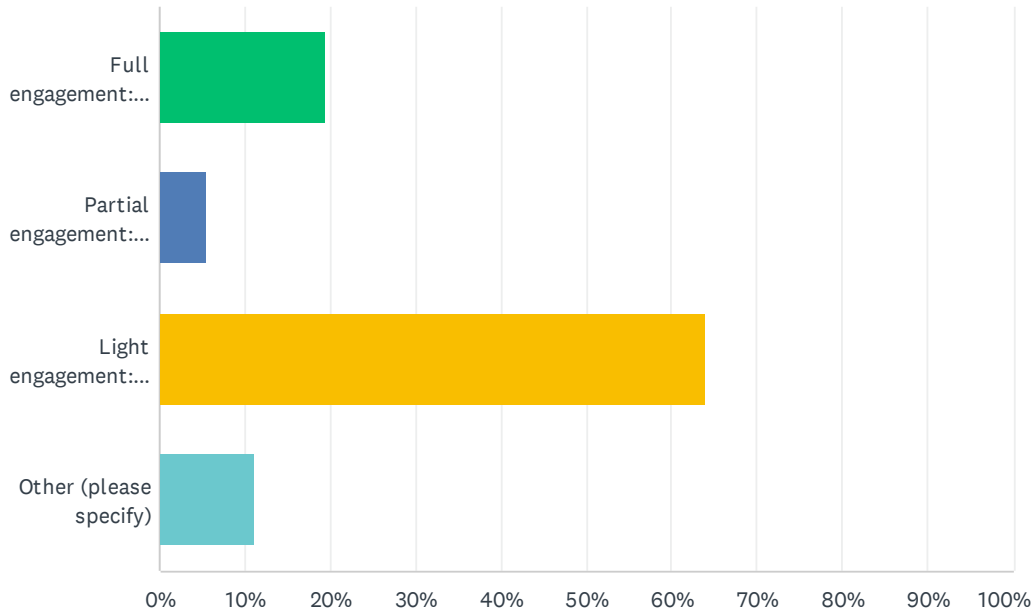

| ANSWER CHOICES                                                                                                                | RESPONSES |    |
|-------------------------------------------------------------------------------------------------------------------------------|-----------|----|
| Full engagement: participate in world congress, participate as volunteer in other activities of the association               | 19.44%    | 7  |
| Partial engagement: participate in world congress, but do not participate as volunteer in other activities of the association | 5.56%     | 2  |
| Light engagement: only follow the activities of the association through online platforms                                      | 63.89%    | 23 |
| Other (please specify)                                                                                                        | 11.11%    | 4  |
| TOTAL                                                                                                                         |           | 36 |

## Q13 Are you a member of IAPSS?

Answered: 36 Skipped: 0

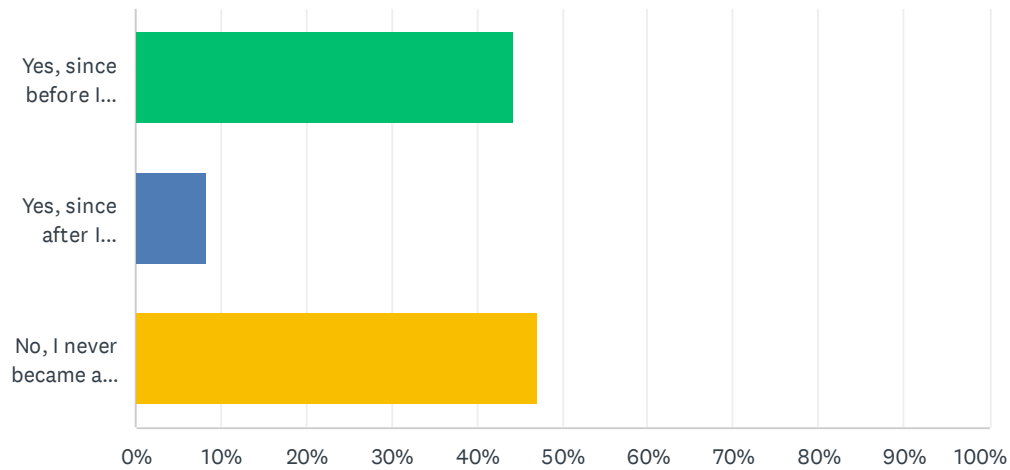

| ANSWER CHOICES                                                                | RESPONSES |    |
|-------------------------------------------------------------------------------|-----------|----|
| Yes, since before I published with IAPSS Politikon                            | 44.44%    | 16 |
| Yes, since after I published with IAPSS Politikon                             | 8.33%     | 3  |
| No, I never became a member, even after having published with IAPSS Politikon | 47.22%    | 17 |
| TOTAL                                                                         |           | 36 |

## Q14 Please rate each component of the publication process for how much or little was helpful to you. Please rate from 1 (strongly disagree) to 5 (strongly agree)

Answered: 34 Skipped: 2

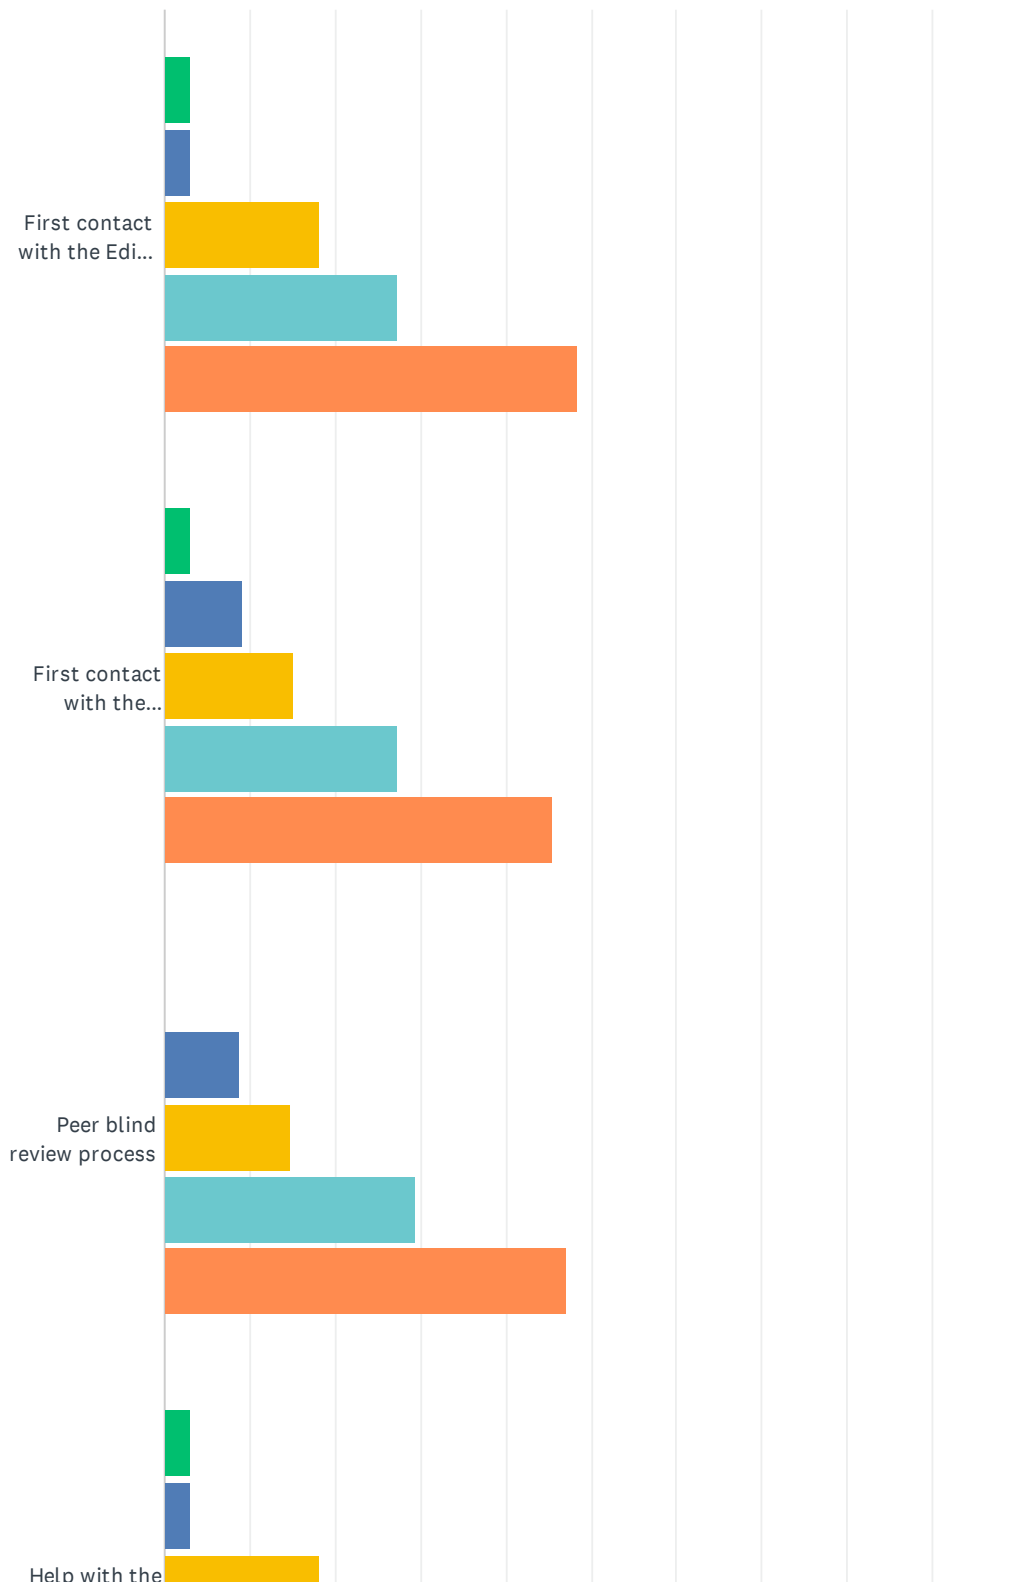

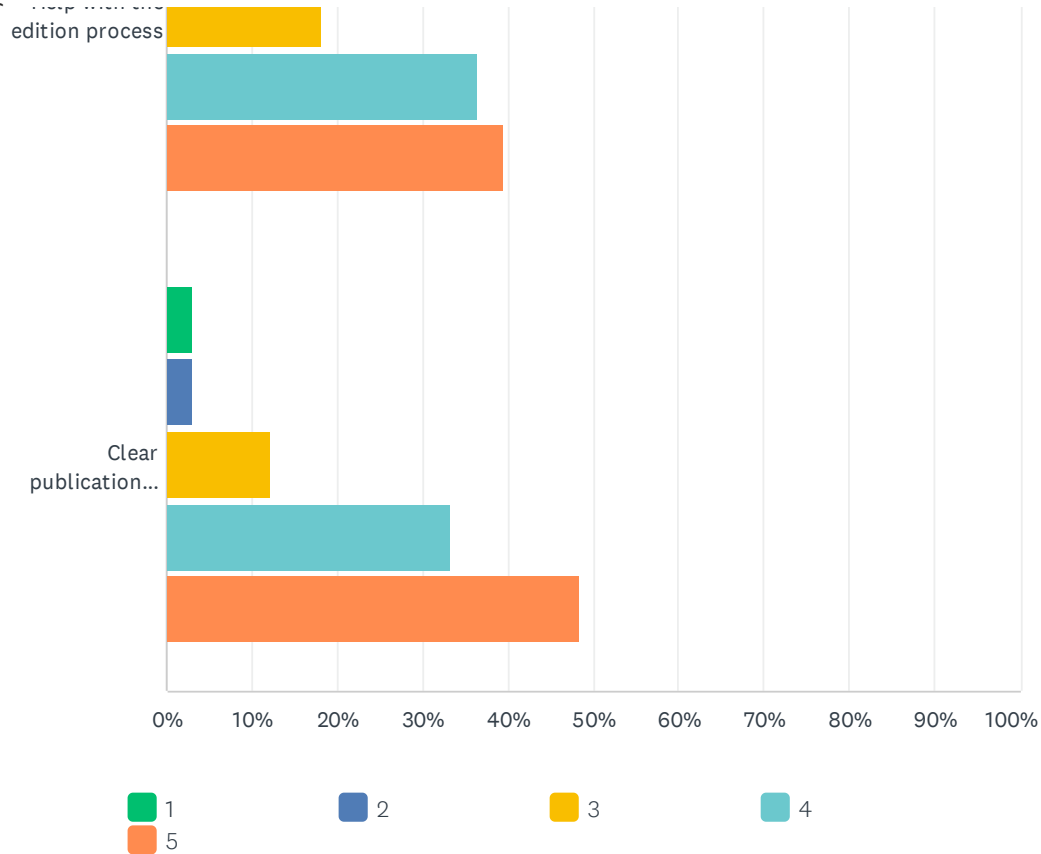

|                                               | 1          | 2          | 3           | 4            | 5            | TOTAL |
|-----------------------------------------------|------------|------------|-------------|--------------|--------------|-------|
| First contact with the Editor in Chief        | 3.03%<br>1 | 3.03%<br>1 | 18.18%<br>6 | 27.27%<br>9  | 48.48%<br>16 | 33    |
| First contact with the Editorial Board member | 3.03%<br>1 | 9.09%<br>3 | 15.15%<br>5 | 27.27%<br>9  | 45.45%<br>15 | 33    |
| Peer blind review process                     | 0.00%<br>0 | 8.82%<br>3 | 14.71%<br>5 | 29.41%<br>10 | 47.06%<br>16 | 34    |
| Help with the edition process                 | 3.03%<br>1 | 3.03%<br>1 | 18.18%<br>6 | 36.36%<br>12 | 39.39%<br>13 | 33    |
| Clear publication guidelines                  | 3.03%<br>1 | 3.03%<br>1 | 12.12%<br>4 | 33.33%<br>11 | 48.48%<br>16 | 33    |

## Q15 Which indexing services are essential for you to submit to a journal?

Answered: 34 Skipped: 2

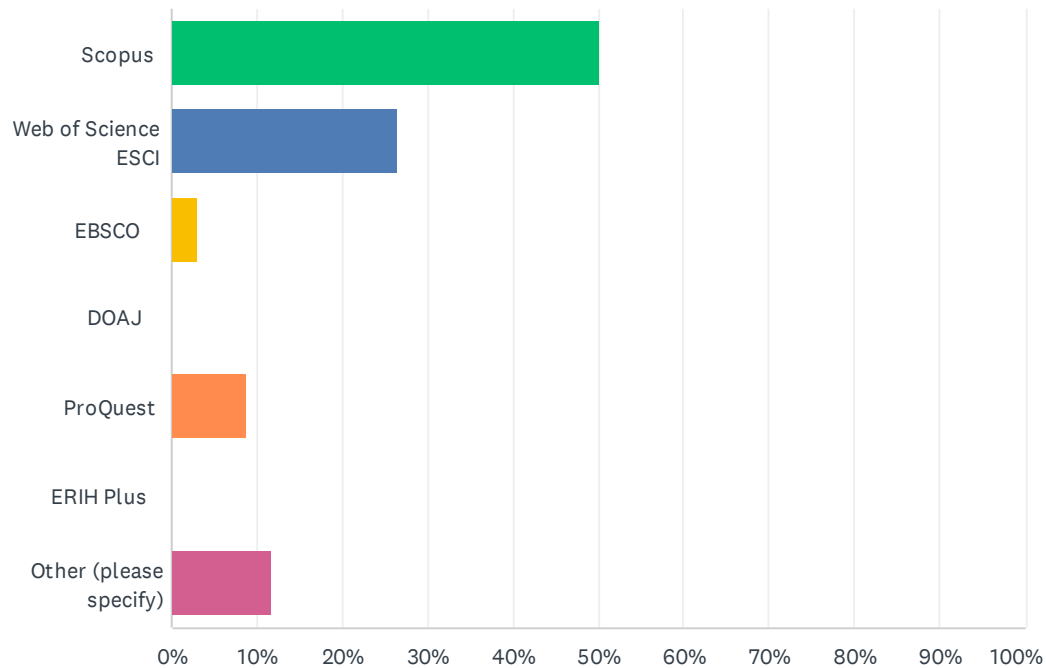

| ANSWER CHOICES         | RESPONSES |    |
|------------------------|-----------|----|
| Scopus                 | 50.00%    | 17 |
| Web of Science ESCI    | 26.47%    | 9  |
| EBSCO                  | 2.94%     | 1  |
| DOAJ                   | 0.00%     | 0  |
| ProQuest               | 8.82%     | 3  |
| ERIH Plus              | 0.00%     | 0  |
| Other (please specify) | 11.76%    | 4  |
| TOTAL                  |           | 34 |

## Q16 Would you publish with Politikon again in the future?

Answered: 33 Skipped: 3

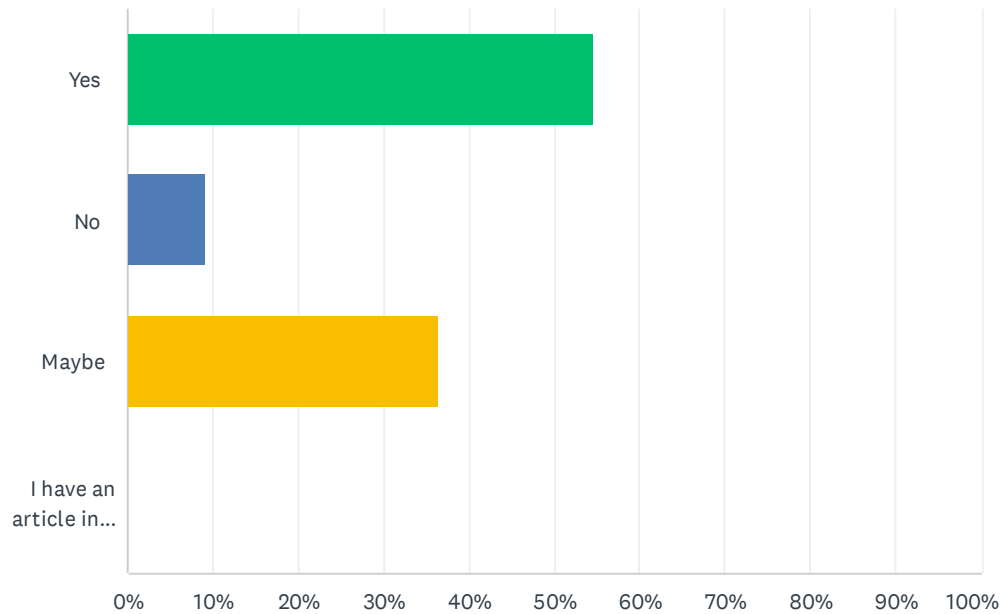

| ANSWER CHOICES               | RESPONSES |    |
|------------------------------|-----------|----|
| Yes                          | 54.55%    | 18 |
| No                           | 9.09%     | 3  |
| Maybe                        | 36.36%    | 12 |
| I have an article in process | 0.00%     | 0  |
| TOTAL                        |           | 33 |

## Q17 Would you recommend your friends or colleagues to publish with Politikon?

Answered: 33 Skipped: 3

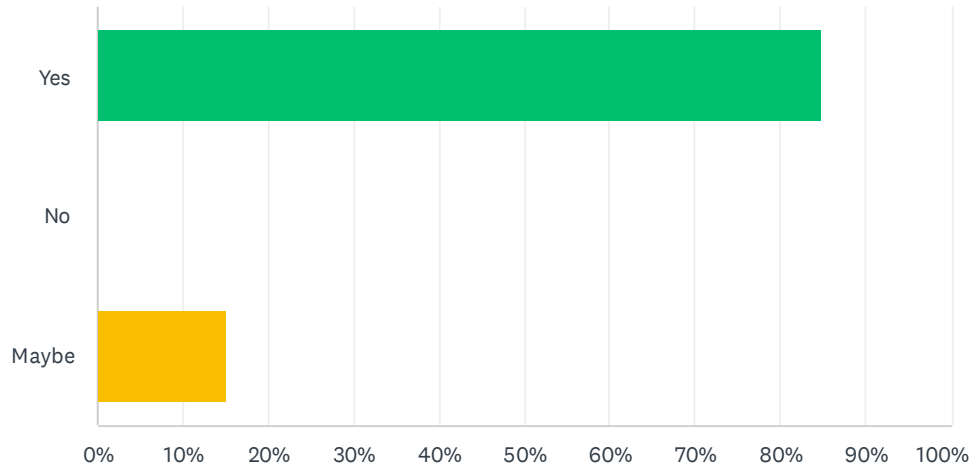

| ANSWER CHOICES |  | RESPONSES |    |
|----------------|--|-----------|----|
| Yes            |  | 84.85%    | 28 |
| No             |  | 0.00%     | 0  |
| Maybe          |  | 15.15%    | 5  |
| TOTAL          |  |           | 33 |

## Q18 How satisfied were you with the frequency of correspondence from the Politikon editorial board?

Answered: 32 Skipped: 4

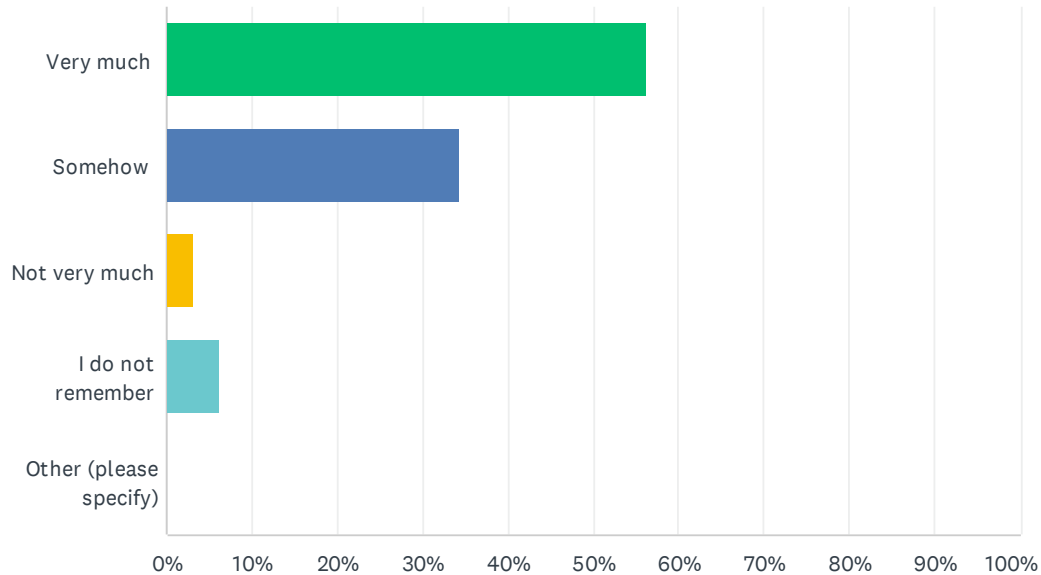

| ANSWER CHOICES         | RESPONSES |    |
|------------------------|-----------|----|
| Very much              | 56.25%    | 18 |
| Somehow                | 34.38%    | 11 |
| Not very much          | 3.13%     | 1  |
| I do not remember      | 6.25%     | 2  |
| Other (please specify) | 0.00%     | 0  |
| TOTAL                  |           | 32 |

## Q19 If your submission was accepted, did you disseminate your article once published?

Answered: 32 Skipped: 4

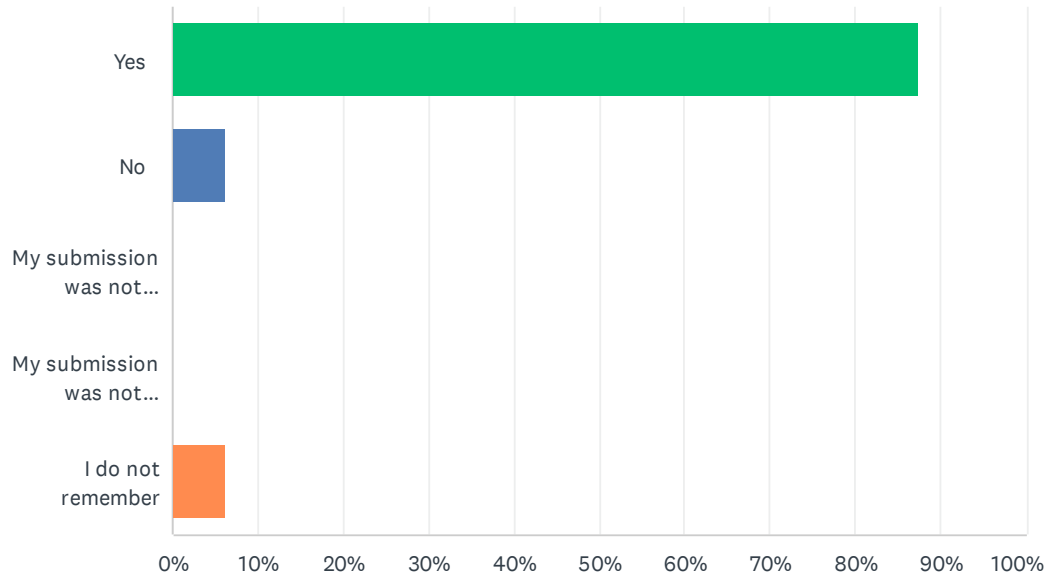

| ANSWER CHOICES                                                                                     | RESPONSES |    |
|----------------------------------------------------------------------------------------------------|-----------|----|
| Yes                                                                                                | 87.50%    | 28 |
| No                                                                                                 | 6.25%     | 2  |
| My submission was not published as I withdrew my manuscript                                        | 0.00%     | 0  |
| My submission was not published as it was rejected by the peer reviews (before or after revisions) | 0.00%     | 0  |
| I do not remember                                                                                  | 6.25%     | 2  |
| TOTAL                                                                                              |           | 32 |

## Q20 If you disseminated your published article, which platforms did you use?

Answered: 28 Skipped: 8

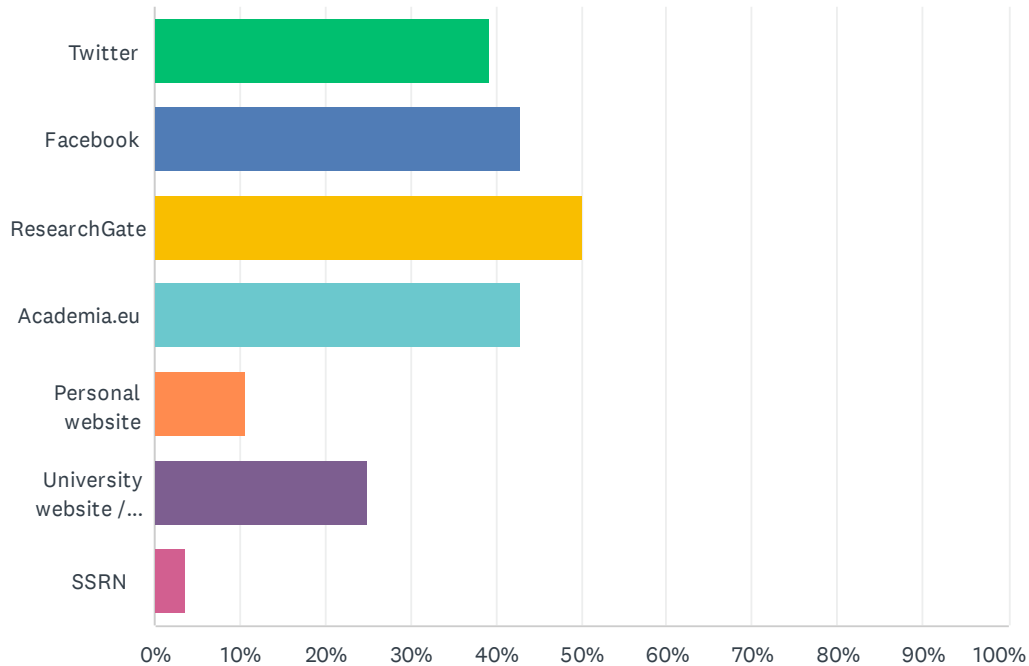

| ANSWER CHOICES                  | RESPONSES |    |
|---------------------------------|-----------|----|
| Twitter                         | 39.29%    | 11 |
| Facebook                        | 42.86%    | 12 |
| ResearchGate                    | 50.00%    | 14 |
| Academia.eu                     | 42.86%    | 12 |
| Personal website                | 10.71%    | 3  |
| University website / depository | 25.00%    | 7  |
| SSRN                            | 3.57%     | 1  |
| Total Respondents: 28           |           |    |

## Q21 What is your age?

Answered: 33 Skipped: 3

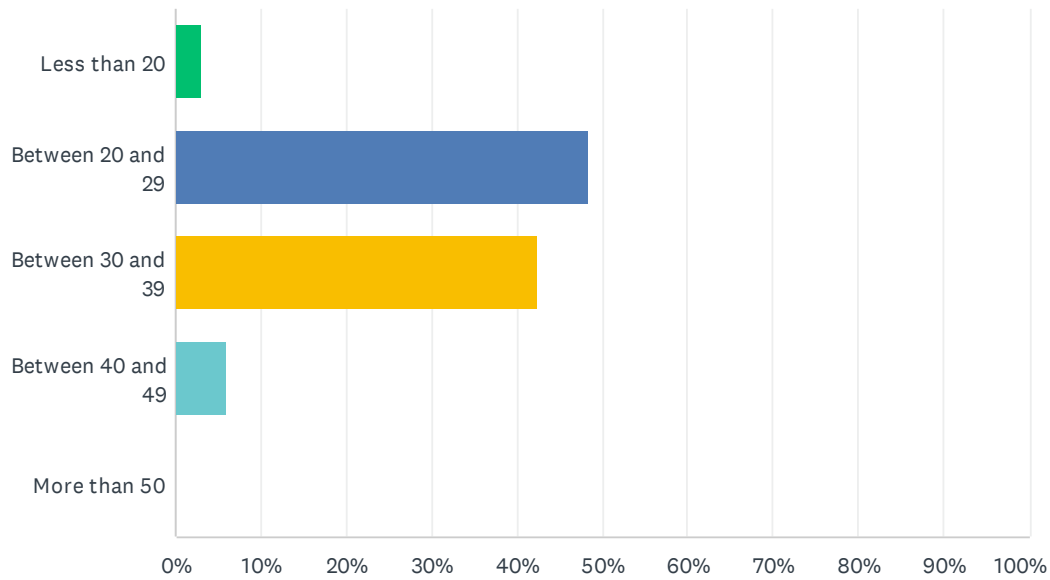

| ANSWER CHOICES    | RESPONSES |    |
|-------------------|-----------|----|
| Less than 20      | 3.03%     | 1  |
| Between 20 and 29 | 48.48%    | 16 |
| Between 30 and 39 | 42.42%    | 14 |
| Between 40 and 49 | 6.06%     | 2  |
| More than 50      | 0.00%     | 0  |
| TOTAL             |           | 33 |

Q22 What country are you from?

Answered: 33    Skipped: 3

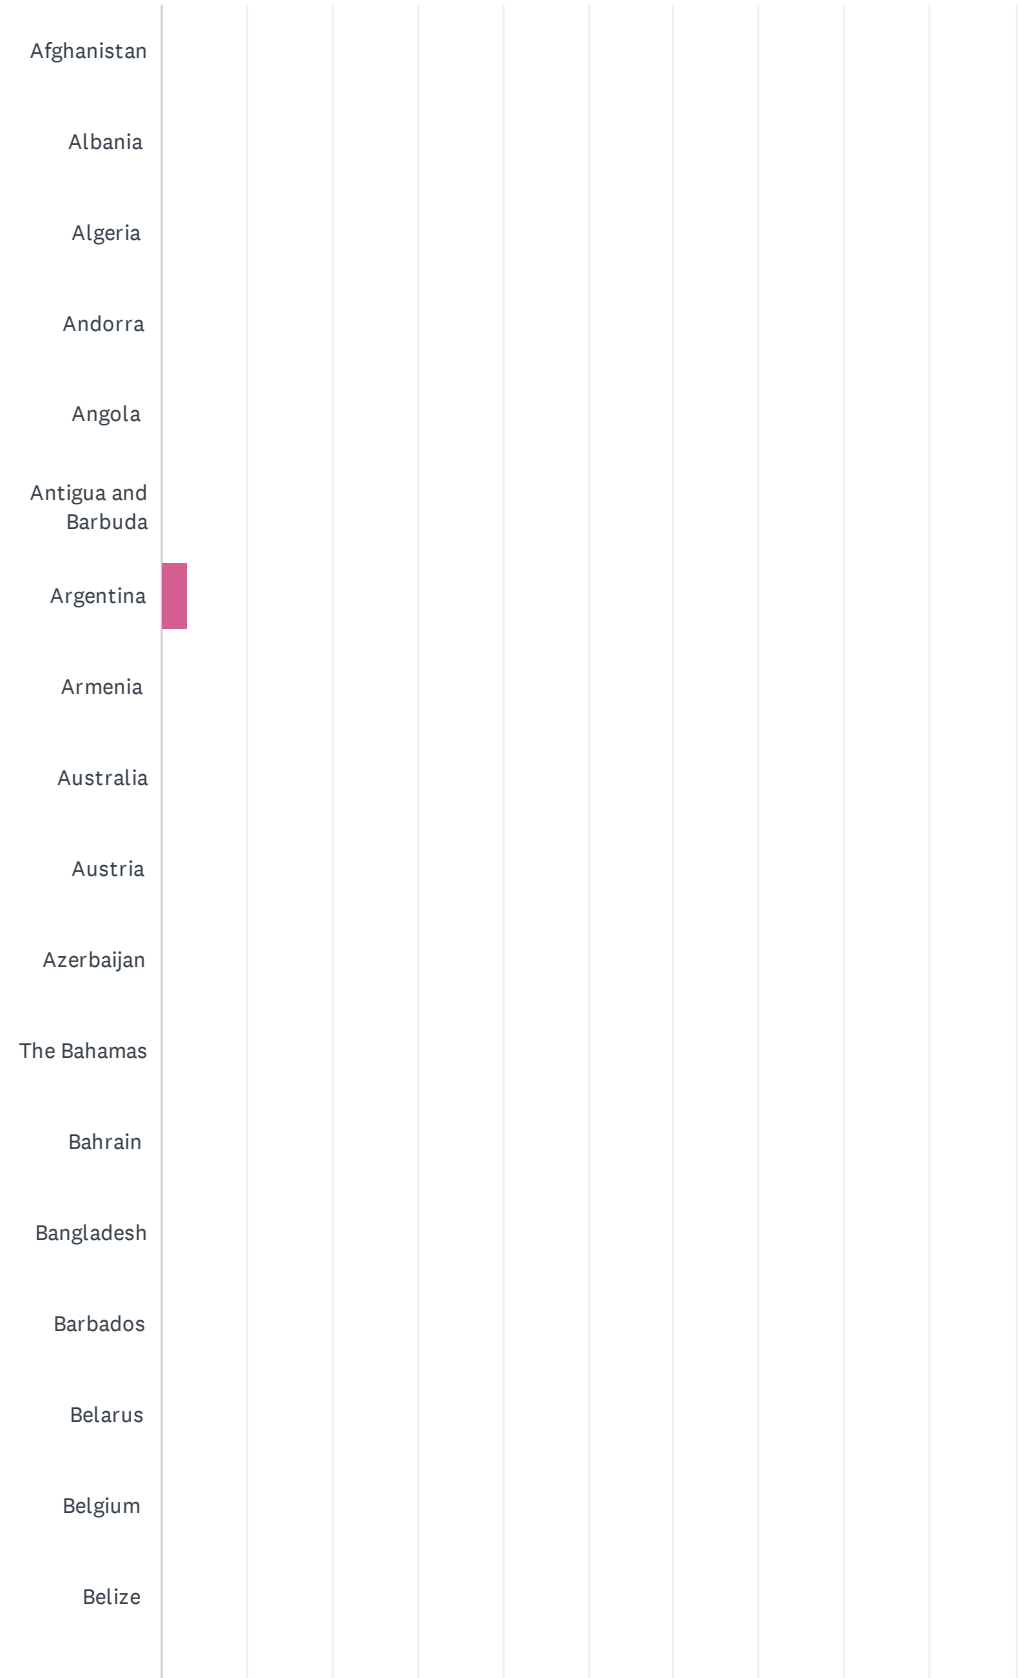

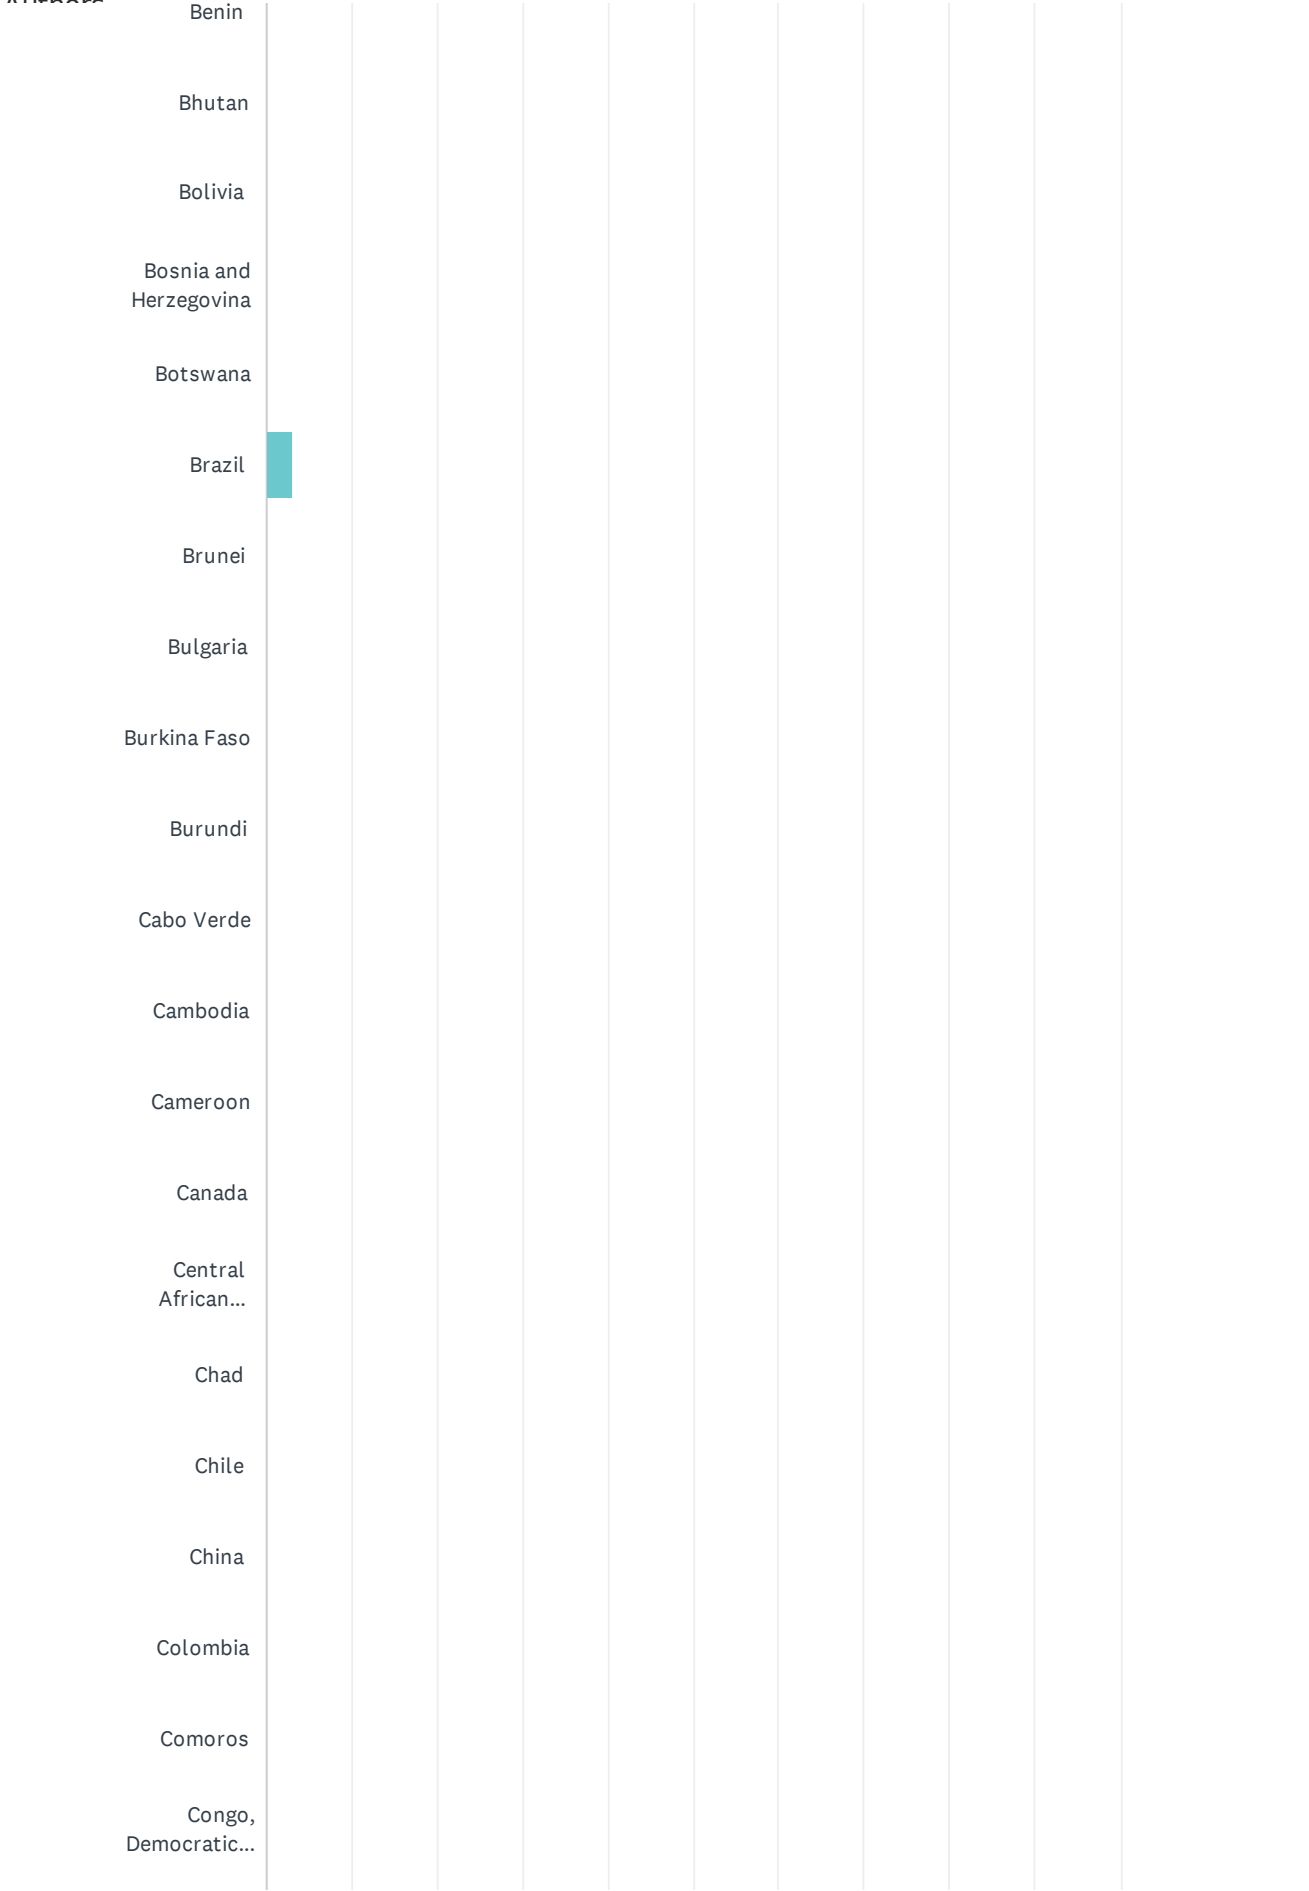

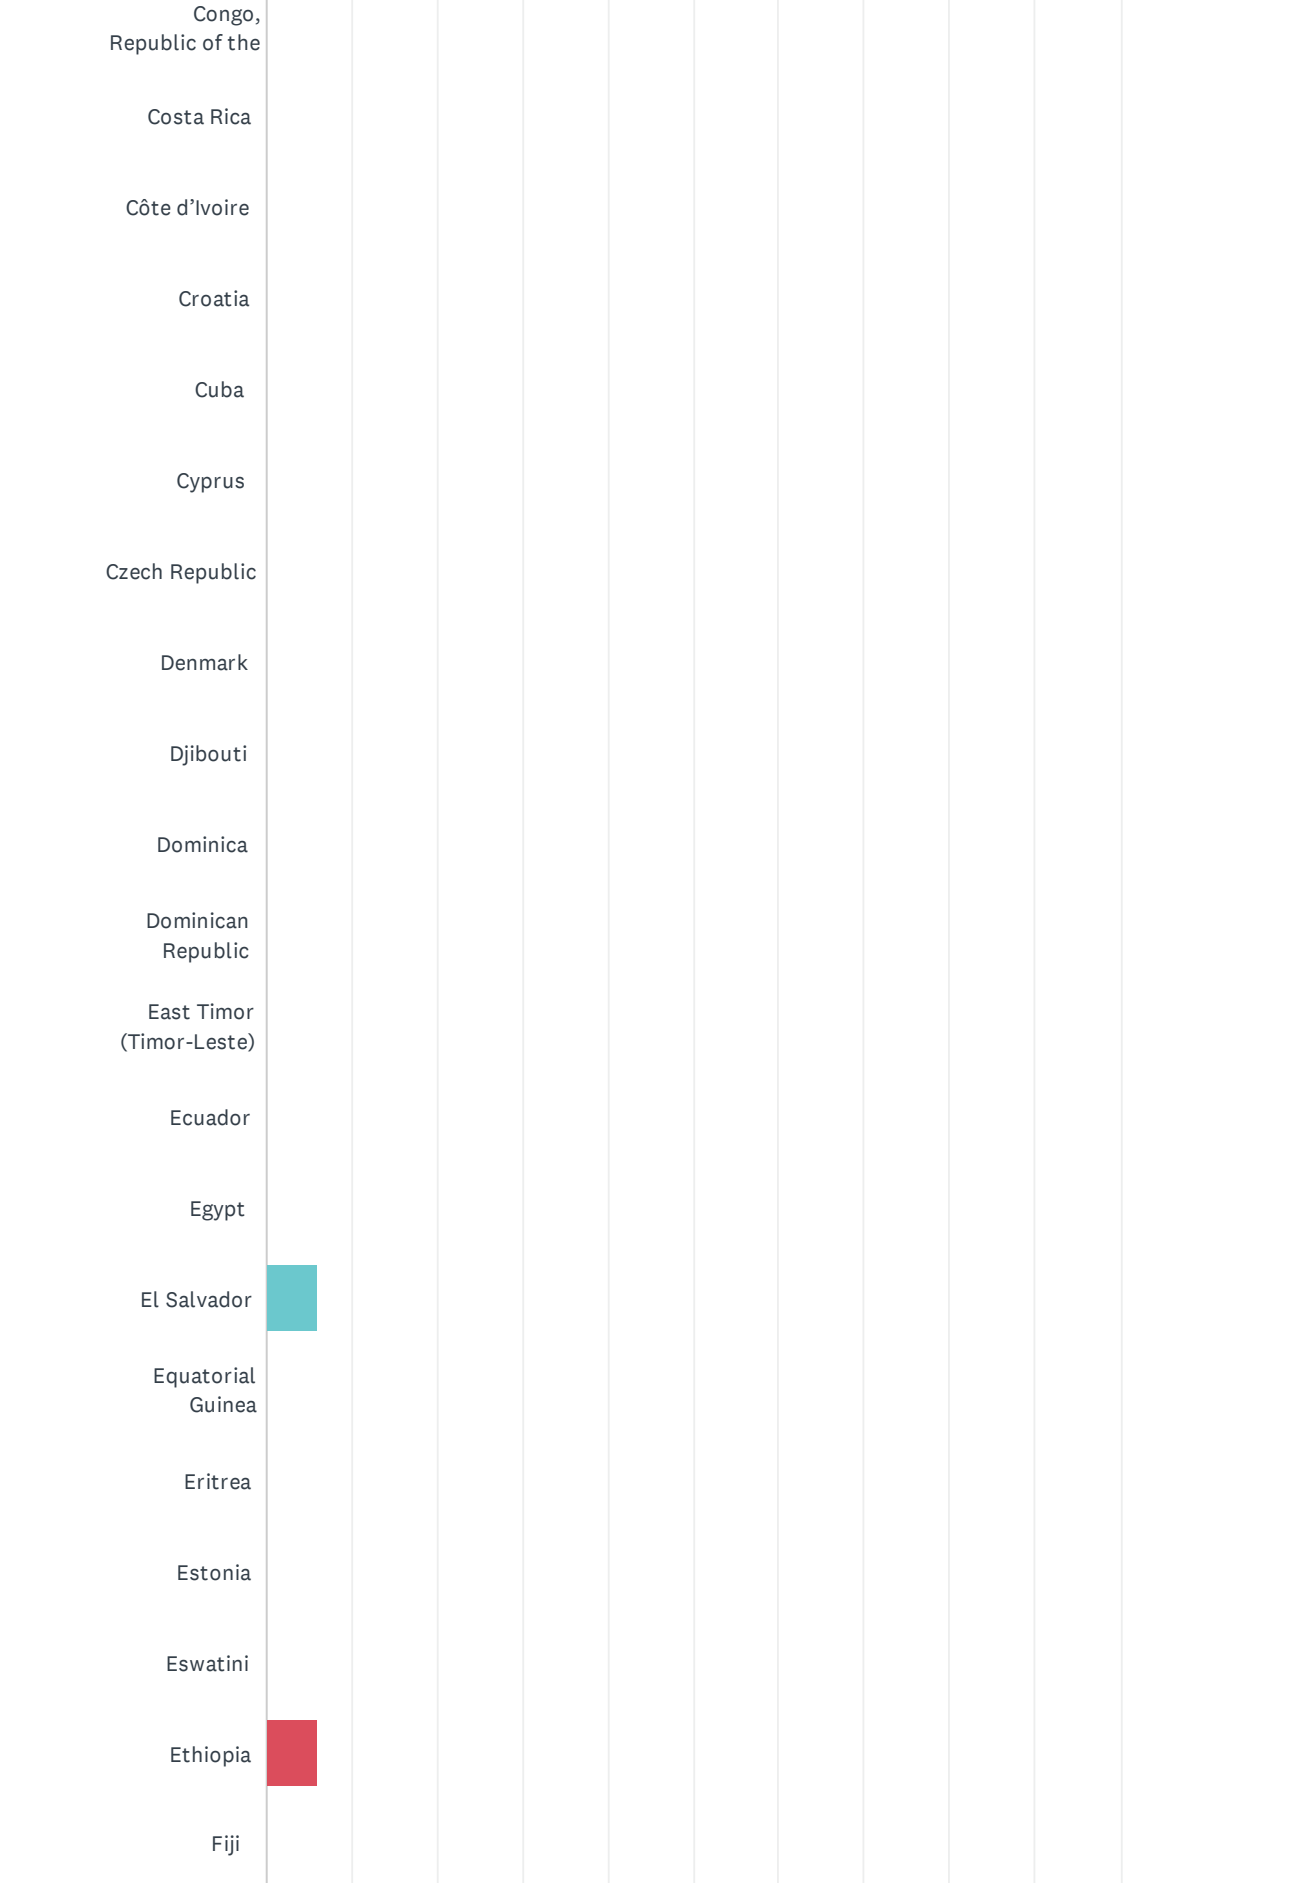

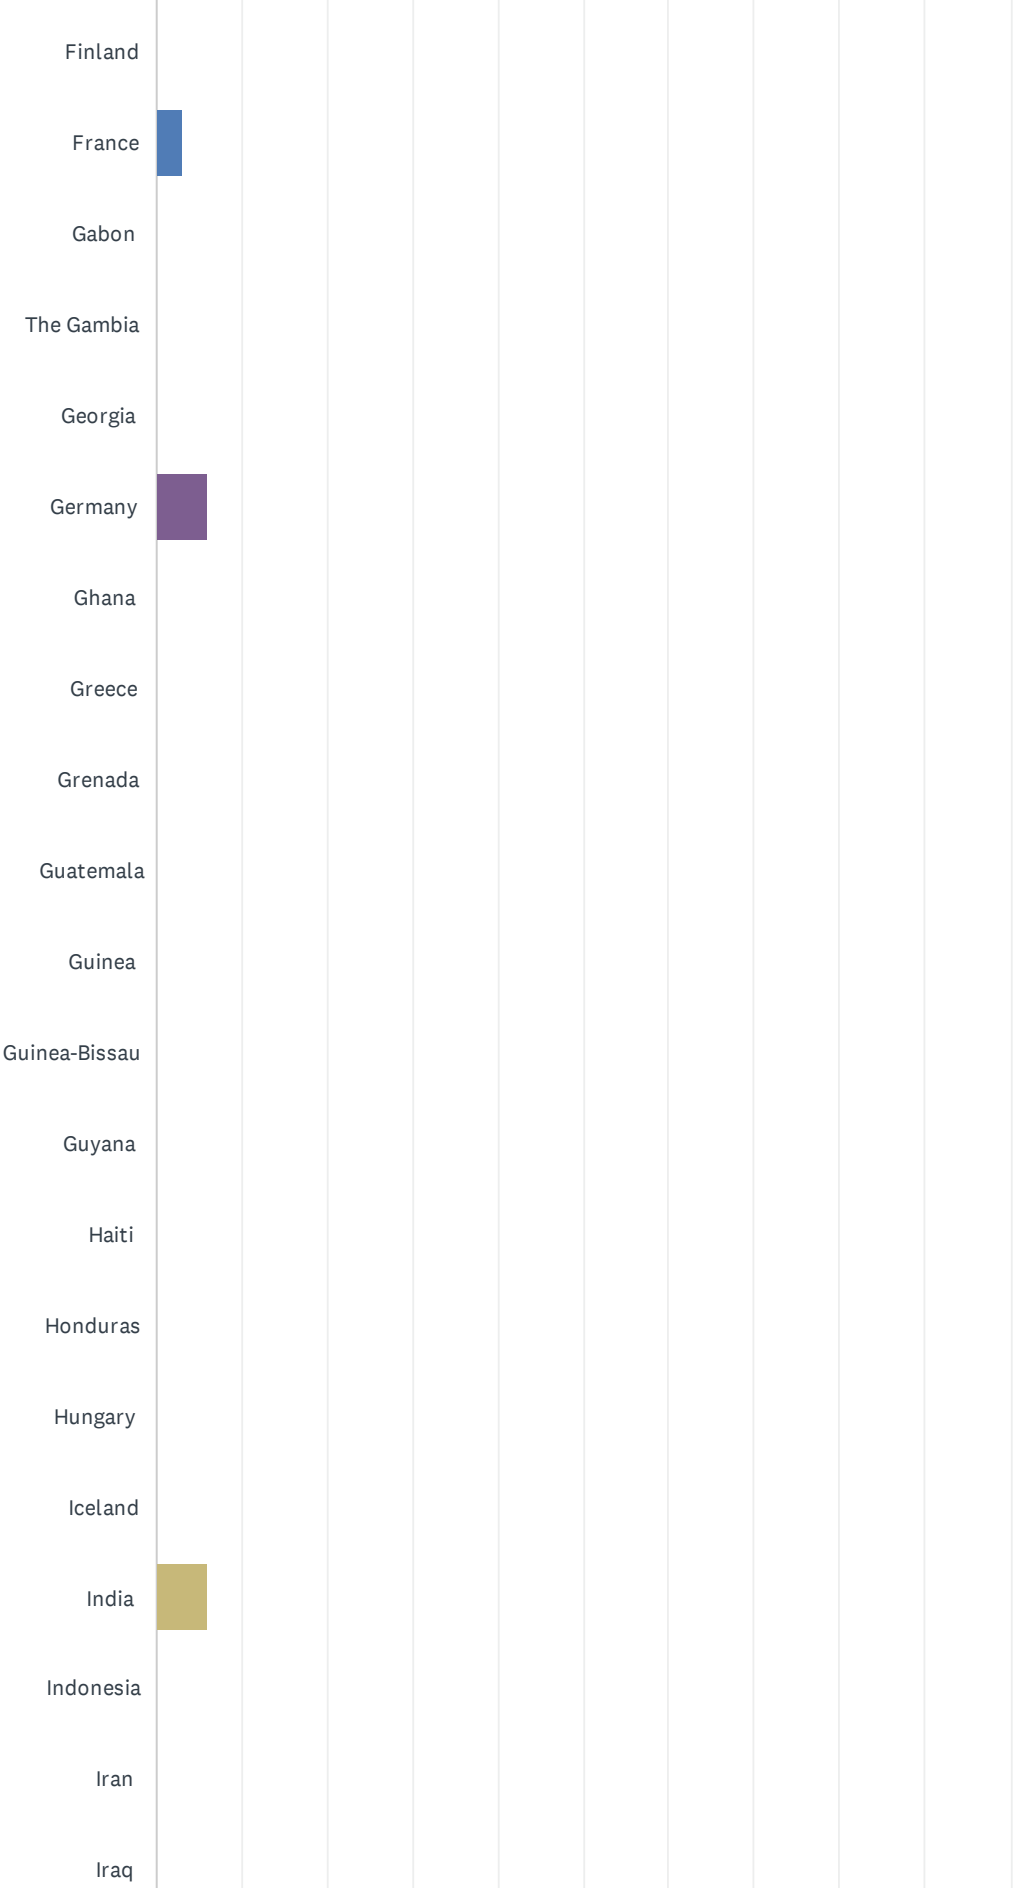

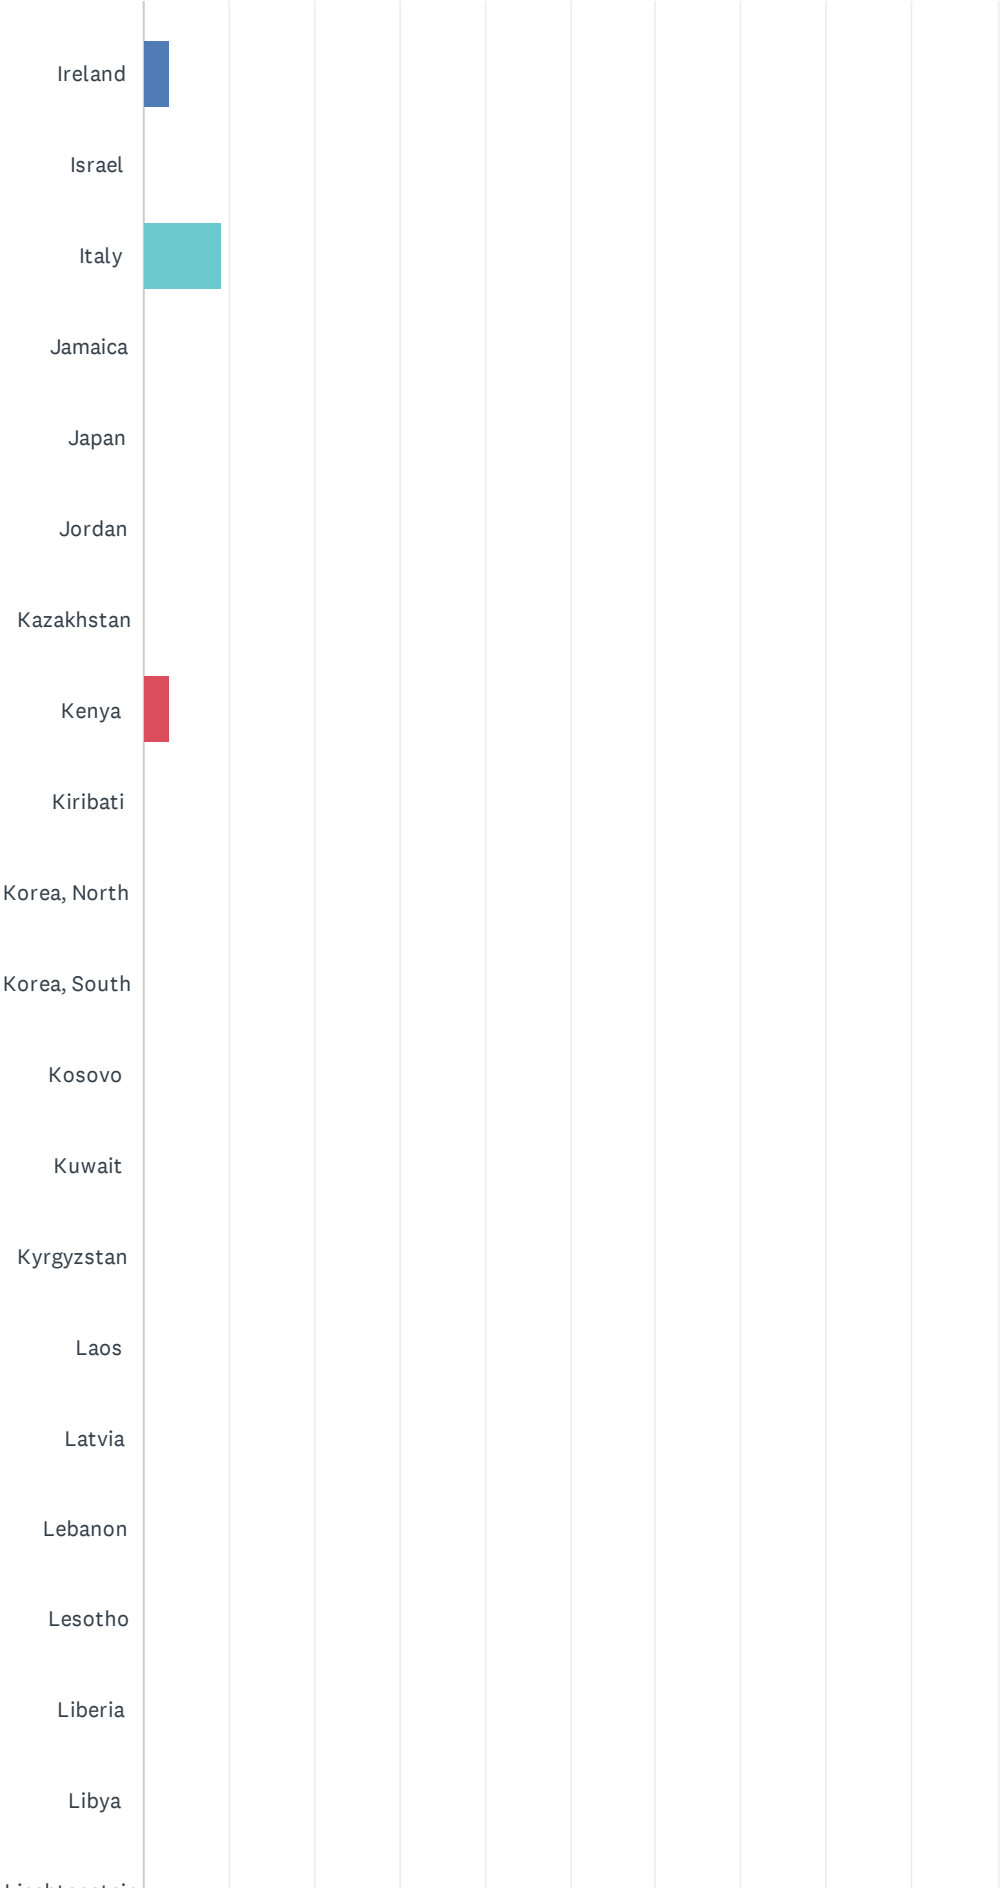

|                                    |
|------------------------------------|
| Liechtenstein                      |
| Lithuania                          |
| Luxembourg                         |
| Madagascar                         |
| Malawi                             |
| Malaysia                           |
| Maldives                           |
| Mali                               |
| Malta                              |
| Marshall Islands                   |
| Mauritania                         |
| Mauritius                          |
| Mexico                             |
| Micronesia,<br>Federated States of |
| Moldova                            |
| Monaco                             |
| Mongolia                           |
| Montenegro                         |
| Morocco                            |
| Mozambique                         |
| Myanmar (Burma)                    |

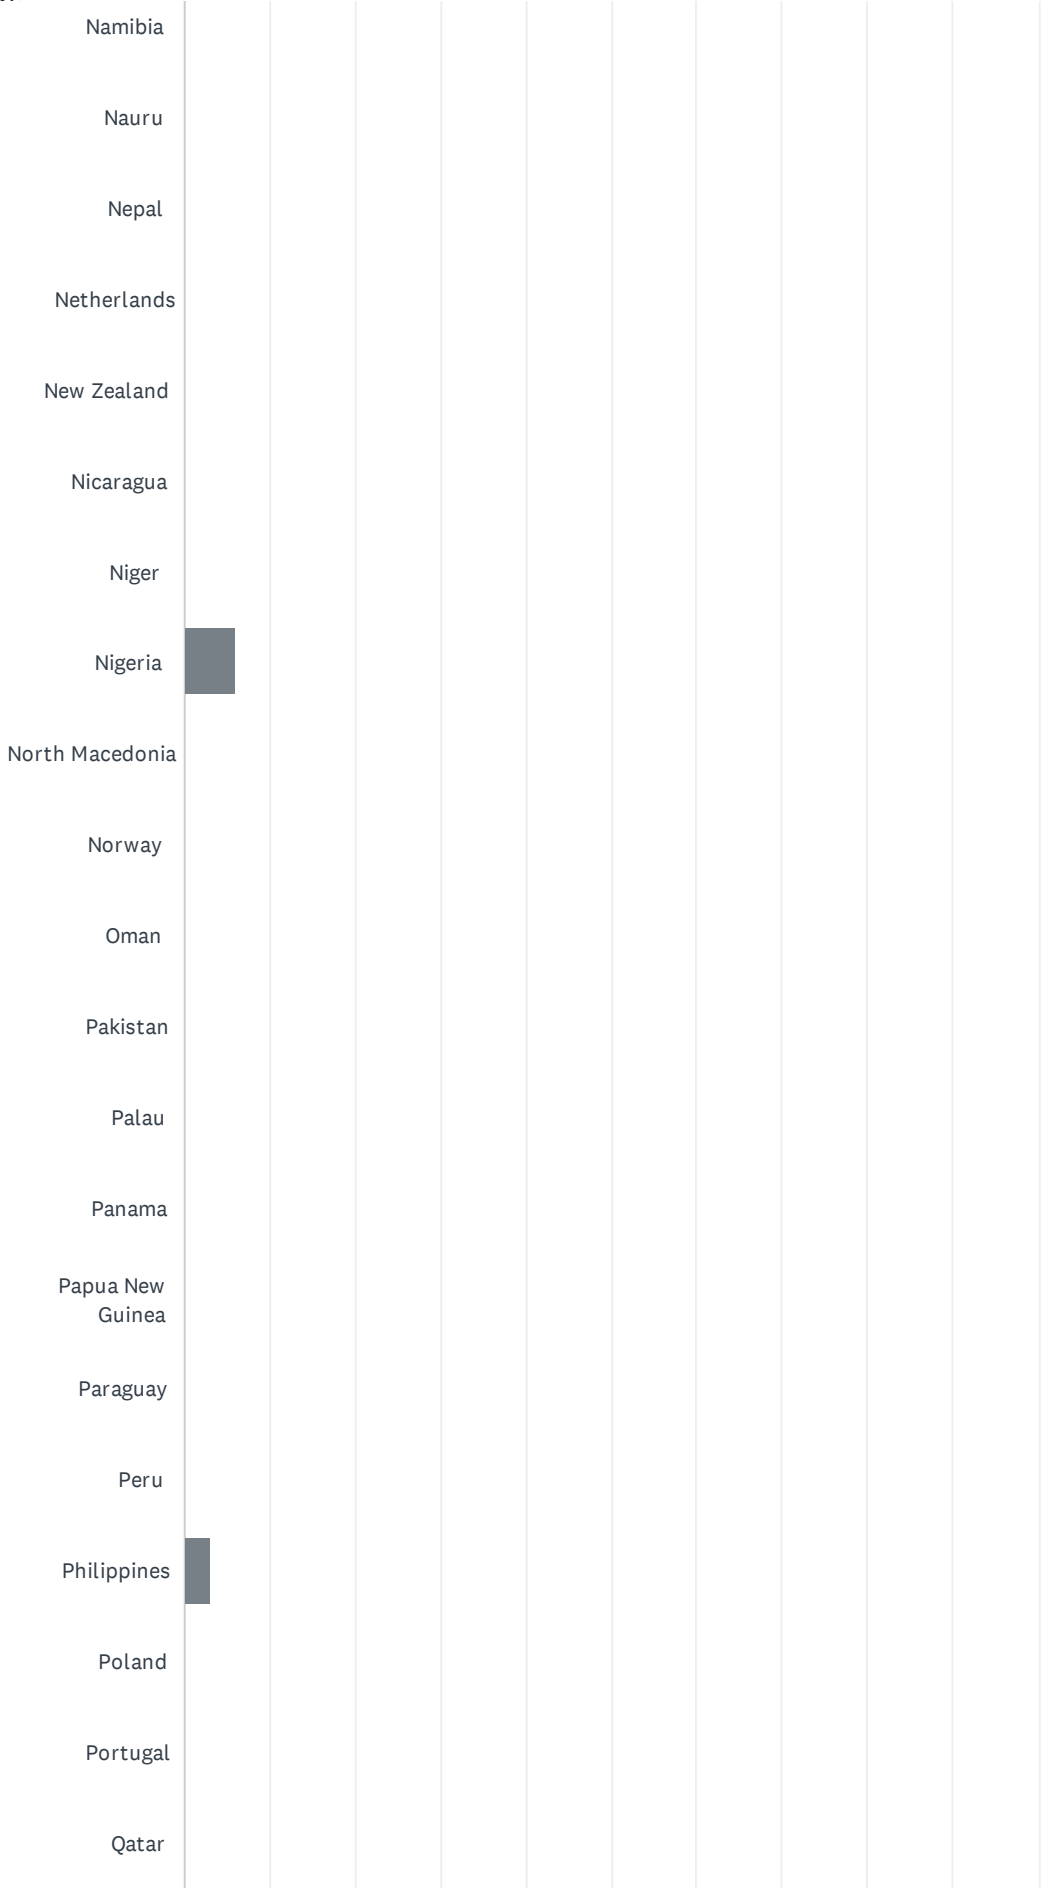

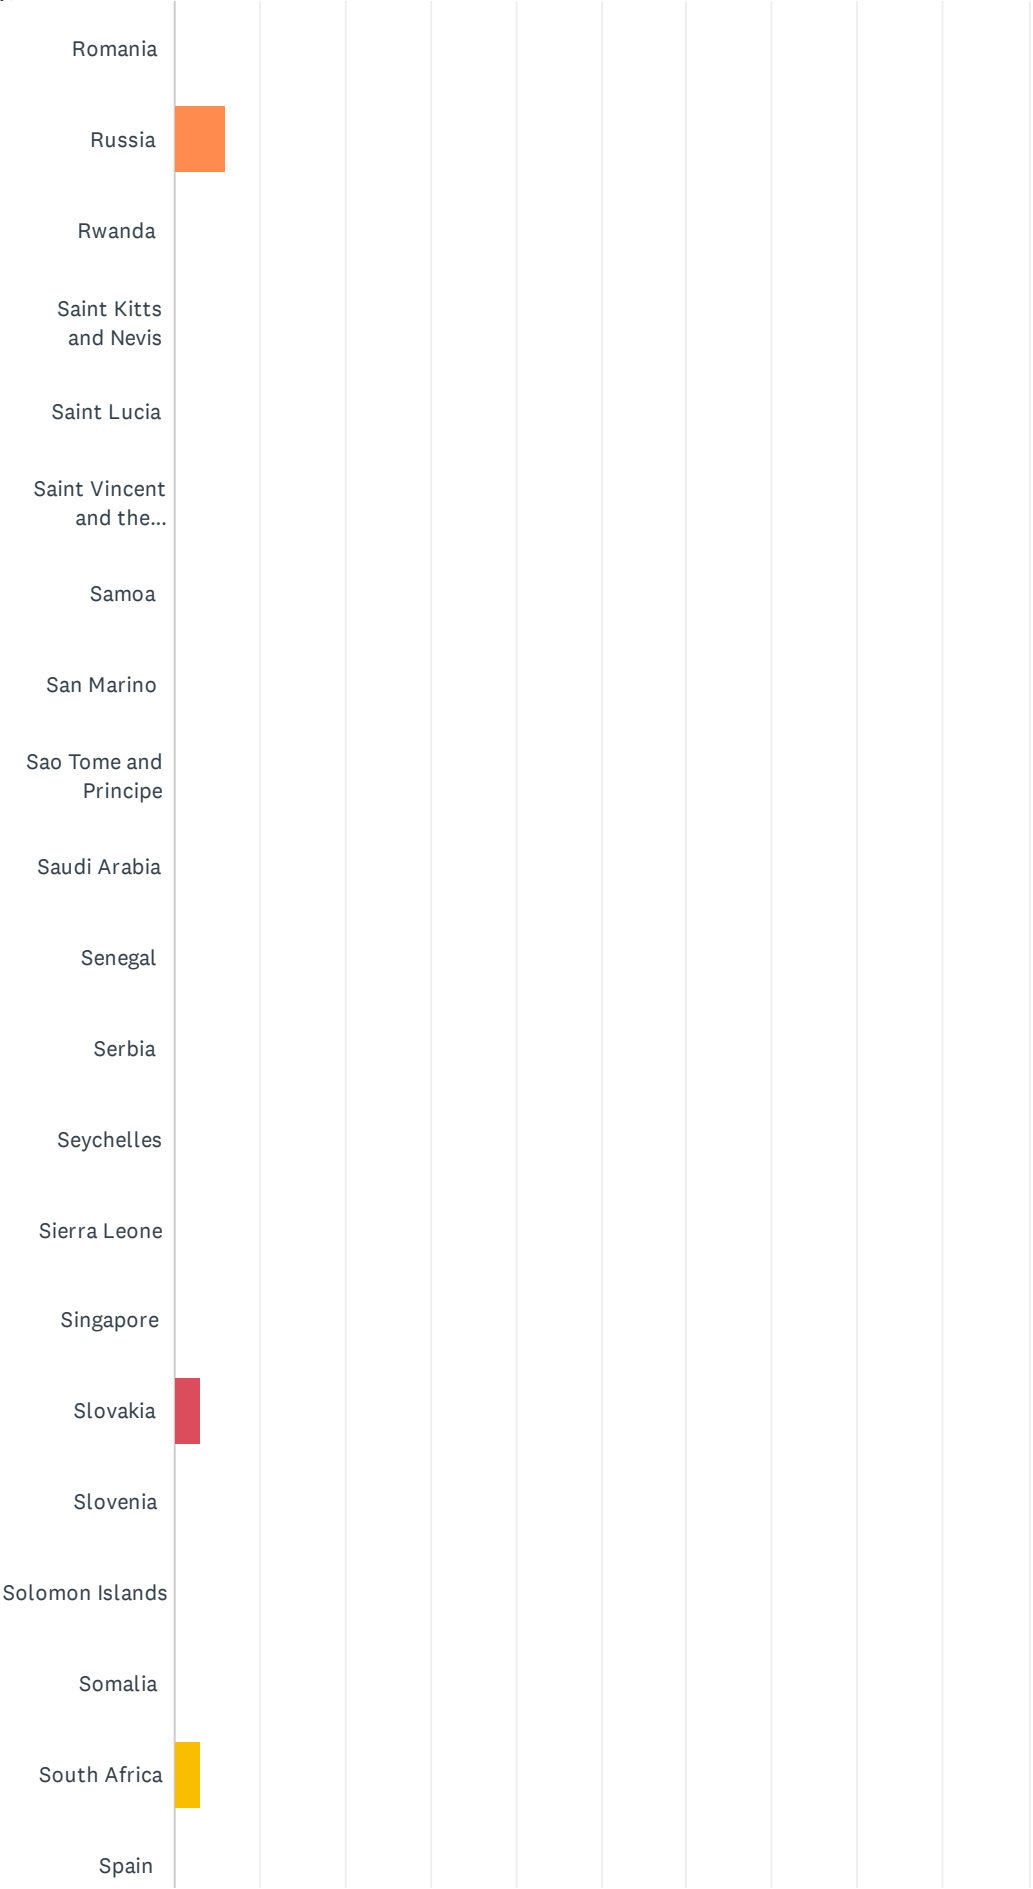

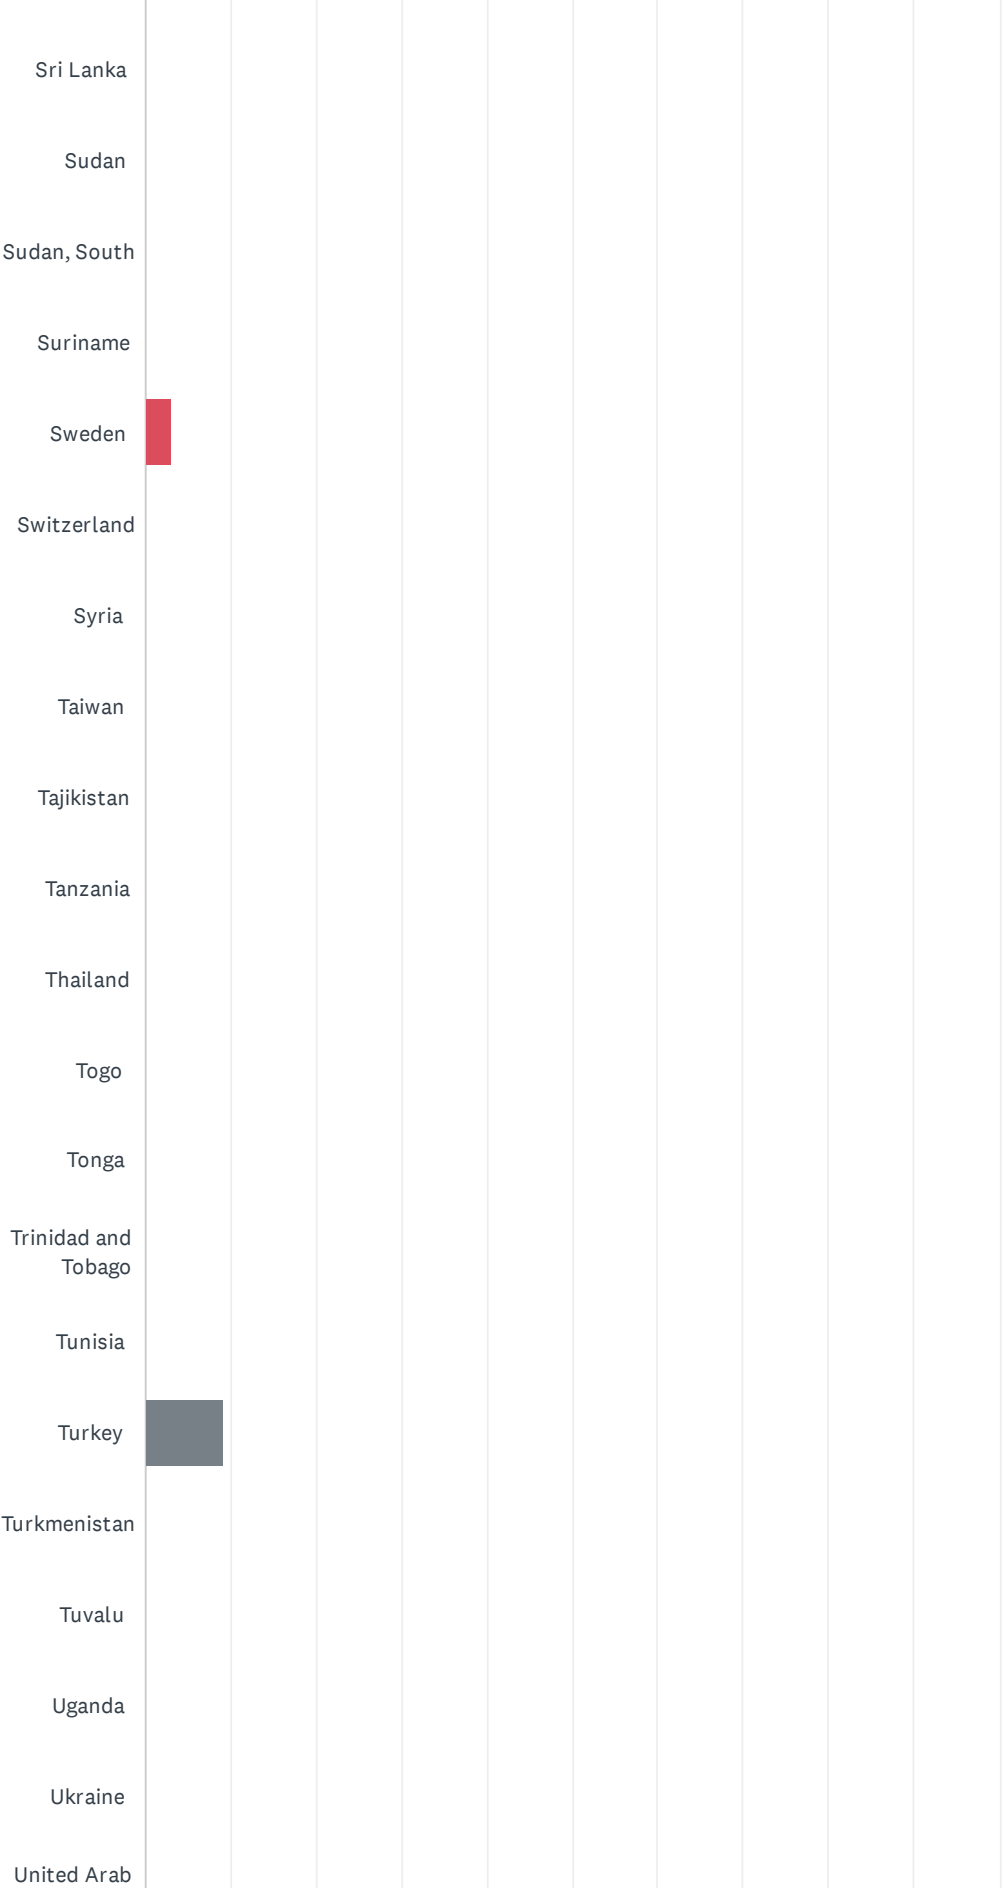

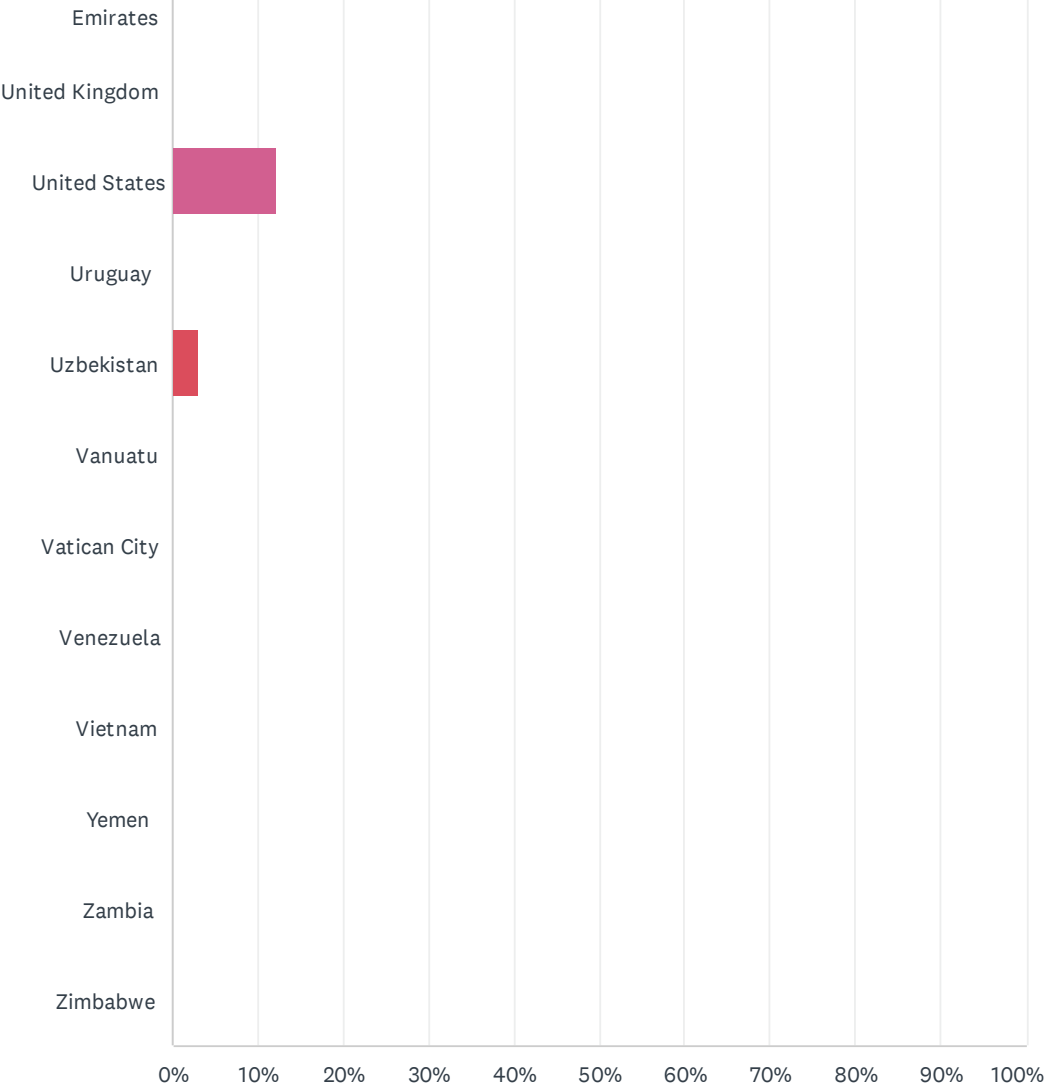

| ANSWER CHOICES         | RESPONSES |   |
|------------------------|-----------|---|
| Afghanistan            | 0.00%     | 0 |
| Albania                | 0.00%     | 0 |
| Algeria                | 0.00%     | 0 |
| Andorra                | 0.00%     | 0 |
| Angola                 | 0.00%     | 0 |
| Antigua and Barbuda    | 0.00%     | 0 |
| Argentina              | 3.03%     | 1 |
| Armenia                | 0.00%     | 0 |
| Australia              | 0.00%     | 0 |
| Austria                | 0.00%     | 0 |
| Azerbaijan             | 0.00%     | 0 |
| The Bahamas            | 0.00%     | 0 |
| Bahrain                | 0.00%     | 0 |
| Bangladesh             | 0.00%     | 0 |
| Barbados               | 0.00%     | 0 |
| Belarus                | 0.00%     | 0 |
| Belgium                | 0.00%     | 0 |
| Belize                 | 0.00%     | 0 |
| Benin                  | 0.00%     | 0 |
| Bhutan                 | 0.00%     | 0 |
| Bolivia                | 0.00%     | 0 |
| Bosnia and Herzegovina | 0.00%     | 0 |
| Botswana               | 0.00%     | 0 |
| Brazil                 | 3.03%     | 1 |
| Brunei                 | 0.00%     | 0 |
| Bulgaria               | 0.00%     | 0 |
| Burkina Faso           | 0.00%     | 0 |
| Burundi                | 0.00%     | 0 |
| Cabo Verde             | 0.00%     | 0 |
| Cambodia               | 0.00%     | 0 |
| Cameroon               | 0.00%     | 0 |
| Canada                 | 0.00%     | 0 |

| Students, Recent Graduates, and Junior Scholars in the Academia: An Analysis of the Impact of IAPSS Politikon in the Academic Careers of its Authors |       | SurveyMonkey |
|------------------------------------------------------------------------------------------------------------------------------------------------------|-------|--------------|
| Central African Republic                                                                                                                             | 0.00% | 0            |
| Chad                                                                                                                                                 | 0.00% | 0            |
| Chile                                                                                                                                                | 0.00% | 0            |
| China                                                                                                                                                | 0.00% | 0            |
| Colombia                                                                                                                                             | 0.00% | 0            |
| Comoros                                                                                                                                              | 0.00% | 0            |
| Congo, Democratic Republic of the                                                                                                                    | 0.00% | 0            |
| Congo, Republic of the                                                                                                                               | 0.00% | 0            |
| Costa Rica                                                                                                                                           | 0.00% | 0            |
| Côte d'Ivoire                                                                                                                                        | 0.00% | 0            |
| Croatia                                                                                                                                              | 0.00% | 0            |
| Cuba                                                                                                                                                 | 0.00% | 0            |
| Cyprus                                                                                                                                               | 0.00% | 0            |
| Czech Republic                                                                                                                                       | 0.00% | 0            |
| Denmark                                                                                                                                              | 0.00% | 0            |
| Djibouti                                                                                                                                             | 0.00% | 0            |
| Dominica                                                                                                                                             | 0.00% | 0            |
| Dominican Republic                                                                                                                                   | 0.00% | 0            |
| East Timor (Timor-Leste)                                                                                                                             | 0.00% | 0            |
| Ecuador                                                                                                                                              | 0.00% | 0            |
| Egypt                                                                                                                                                | 0.00% | 0            |
| El Salvador                                                                                                                                          | 6.06% | 2            |
| Equatorial Guinea                                                                                                                                    | 0.00% | 0            |
| Eritrea                                                                                                                                              | 0.00% | 0            |
| Estonia                                                                                                                                              | 0.00% | 0            |
| Eswatini                                                                                                                                             | 0.00% | 0            |
| Ethiopia                                                                                                                                             | 6.06% | 2            |
| Fiji                                                                                                                                                 | 0.00% | 0            |
| Finland                                                                                                                                              | 0.00% | 0            |
| France                                                                                                                                               | 3.03% | 1            |
| Gabon                                                                                                                                                | 0.00% | 0            |
| The Gambia                                                                                                                                           | 0.00% | 0            |
| Georgia                                                                                                                                              | 0.00% | 0            |
| Germany                                                                                                                                              | 6.06% | 2            |

|               |       |   |
|---------------|-------|---|
| Ghana         | 0.00% | 0 |
| Greece        | 0.00% | 0 |
| Grenada       | 0.00% | 0 |
| Guatemala     | 0.00% | 0 |
| Guinea        | 0.00% | 0 |
| Guinea-Bissau | 0.00% | 0 |
| Guyana        | 0.00% | 0 |
| Haiti         | 0.00% | 0 |
| Honduras      | 0.00% | 0 |
| Hungary       | 0.00% | 0 |
| Iceland       | 0.00% | 0 |
| India         | 6.06% | 2 |
| Indonesia     | 0.00% | 0 |
| Iran          | 0.00% | 0 |
| Iraq          | 0.00% | 0 |
| Ireland       | 3.03% | 1 |
| Israel        | 0.00% | 0 |
| Italy         | 9.09% | 3 |
| Jamaica       | 0.00% | 0 |
| Japan         | 0.00% | 0 |
| Jordan        | 0.00% | 0 |
| Kazakhstan    | 0.00% | 0 |
| Kenya         | 3.03% | 1 |
| Kiribati      | 0.00% | 0 |
| Korea, North  | 0.00% | 0 |
| Korea, South  | 0.00% | 0 |
| Kosovo        | 0.00% | 0 |
| Kuwait        | 0.00% | 0 |
| Kyrgyzstan    | 0.00% | 0 |
| Laos          | 0.00% | 0 |
| Latvia        | 0.00% | 0 |
| Lebanon       | 0.00% | 0 |
| Lesotho       | 0.00% | 0 |

# Students, Recent Graduates, and Junior Scholars in the Academia: An Analysis of the Impact of IAPSS Politikon in the Academic Careers of its Authors

SurveyMonkey

|                                 |       |   |
|---------------------------------|-------|---|
| Liberia                         | 0.00% | 0 |
| Libya                           | 0.00% | 0 |
| Liechtenstein                   | 0.00% | 0 |
| Lithuania                       | 0.00% | 0 |
| Luxembourg                      | 0.00% | 0 |
| Madagascar                      | 0.00% | 0 |
| Malawi                          | 0.00% | 0 |
| Malaysia                        | 0.00% | 0 |
| Maldives                        | 0.00% | 0 |
| Mali                            | 0.00% | 0 |
| Malta                           | 0.00% | 0 |
| Marshall Islands                | 0.00% | 0 |
| Mauritania                      | 0.00% | 0 |
| Mauritius                       | 0.00% | 0 |
| Mexico                          | 3.03% | 1 |
| Micronesia, Federated States of | 0.00% | 0 |
| Moldova                         | 0.00% | 0 |
| Monaco                          | 0.00% | 0 |
| Mongolia                        | 0.00% | 0 |
| Montenegro                      | 0.00% | 0 |
| Morocco                         | 0.00% | 0 |
| Mozambique                      | 0.00% | 0 |
| Myanmar (Burma)                 | 0.00% | 0 |
| Namibia                         | 0.00% | 0 |
| Nauru                           | 0.00% | 0 |
| Nepal                           | 0.00% | 0 |
| Netherlands                     | 0.00% | 0 |
| New Zealand                     | 0.00% | 0 |
| Nicaragua                       | 0.00% | 0 |
| Niger                           | 0.00% | 0 |
| Nigeria                         | 6.06% | 2 |
| North Macedonia                 | 0.00% | 0 |
| Norway                          | 0.00% | 0 |

# Students, Recent Graduates, and Junior Scholars in the Academia: An Analysis of the Impact of IAPSS Politikon in the Academic Careers of its Authors

SurveyMonkey

|                                  |       |   |
|----------------------------------|-------|---|
| Oman                             | 0.00% | 0 |
| Pakistan                         | 0.00% | 0 |
| Palau                            | 0.00% | 0 |
| Panama                           | 0.00% | 0 |
| Papua New Guinea                 | 0.00% | 0 |
| Paraguay                         | 0.00% | 0 |
| Peru                             | 0.00% | 0 |
| Philippines                      | 3.03% | 1 |
| Poland                           | 0.00% | 0 |
| Portugal                         | 0.00% | 0 |
| Qatar                            | 0.00% | 0 |
| Romania                          | 0.00% | 0 |
| Russia                           | 6.06% | 2 |
| Rwanda                           | 0.00% | 0 |
| Saint Kitts and Nevis            | 0.00% | 0 |
| Saint Lucia                      | 0.00% | 0 |
| Saint Vincent and the Grenadines | 0.00% | 0 |
| Samoa                            | 0.00% | 0 |
| San Marino                       | 0.00% | 0 |
| Sao Tome and Principe            | 0.00% | 0 |
| Saudi Arabia                     | 0.00% | 0 |
| Senegal                          | 0.00% | 0 |
| Serbia                           | 0.00% | 0 |
| Seychelles                       | 0.00% | 0 |
| Sierra Leone                     | 0.00% | 0 |
| Singapore                        | 0.00% | 0 |
| Slovakia                         | 3.03% | 1 |
| Slovenia                         | 0.00% | 0 |
| Solomon Islands                  | 0.00% | 0 |
| Somalia                          | 0.00% | 0 |
| South Africa                     | 3.03% | 1 |
| Spain                            | 0.00% | 0 |
| Sri Lanka                        | 0.00% | 0 |

# Students, Recent Graduates, and Junior Scholars in the Academia: An Analysis of the Impact of IAPSS Politikon in the Academic Careers of its Authors

SurveyMonkey

|                      |        |    |
|----------------------|--------|----|
| Sudan                | 0.00%  | 0  |
| Sudan, South         | 0.00%  | 0  |
| Suriname             | 0.00%  | 0  |
| Sweden               | 3.03%  | 1  |
| Switzerland          | 0.00%  | 0  |
| Syria                | 0.00%  | 0  |
| Taiwan               | 0.00%  | 0  |
| Tajikistan           | 0.00%  | 0  |
| Tanzania             | 0.00%  | 0  |
| Thailand             | 0.00%  | 0  |
| Togo                 | 0.00%  | 0  |
| Tonga                | 0.00%  | 0  |
| Trinidad and Tobago  | 0.00%  | 0  |
| Tunisia              | 0.00%  | 0  |
| Turkey               | 9.09%  | 3  |
| Turkmenistan         | 0.00%  | 0  |
| Tuvalu               | 0.00%  | 0  |
| Uganda               | 0.00%  | 0  |
| Ukraine              | 0.00%  | 0  |
| United Arab Emirates | 0.00%  | 0  |
| United Kingdom       | 0.00%  | 0  |
| United States        | 12.12% | 4  |
| Uruguay              | 0.00%  | 0  |
| Uzbekistan           | 3.03%  | 1  |
| Vanuatu              | 0.00%  | 0  |
| Vatican City         | 0.00%  | 0  |
| Venezuela            | 0.00%  | 0  |
| Vietnam              | 0.00%  | 0  |
| Yemen                | 0.00%  | 0  |
| Zambia               | 0.00%  | 0  |
| Zimbabwe             | 0.00%  | 0  |
| TOTAL                |        | 33 |

Q23 What is your gender?

Answered: 33 Skipped: 3

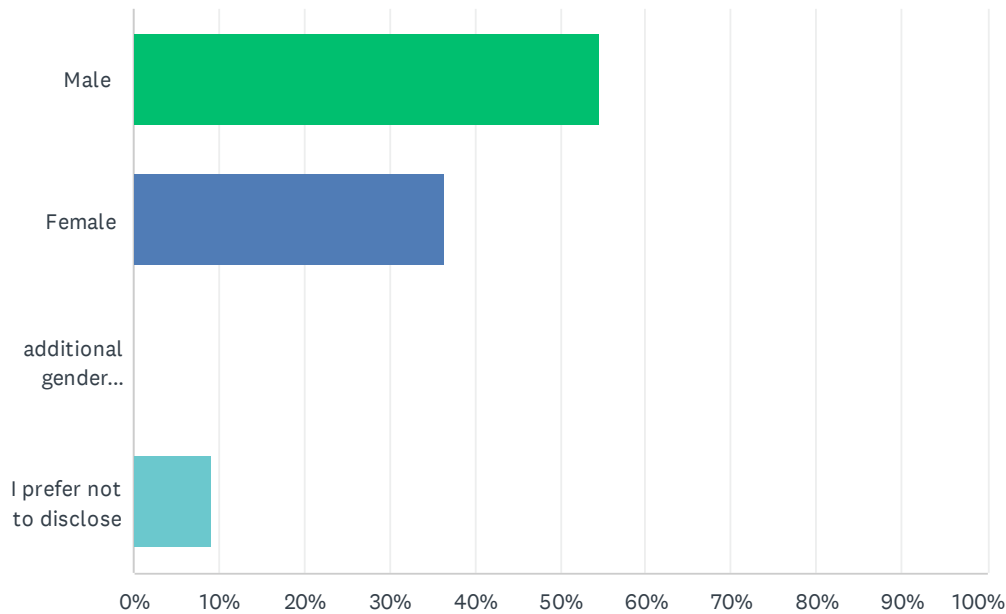

| ANSWER CHOICES                                 | RESPONSES |    |
|------------------------------------------------|-----------|----|
| Male                                           | 54.55%    | 18 |
| Female                                         | 36.36%    | 12 |
| additional gender category/identity not listed | 0.00%     | 0  |
| I prefer not to disclose                       | 9.09%     | 3  |
| TOTAL                                          |           | 33 |

## Q24 What is your highest education level?

Answered: 33 Skipped: 3

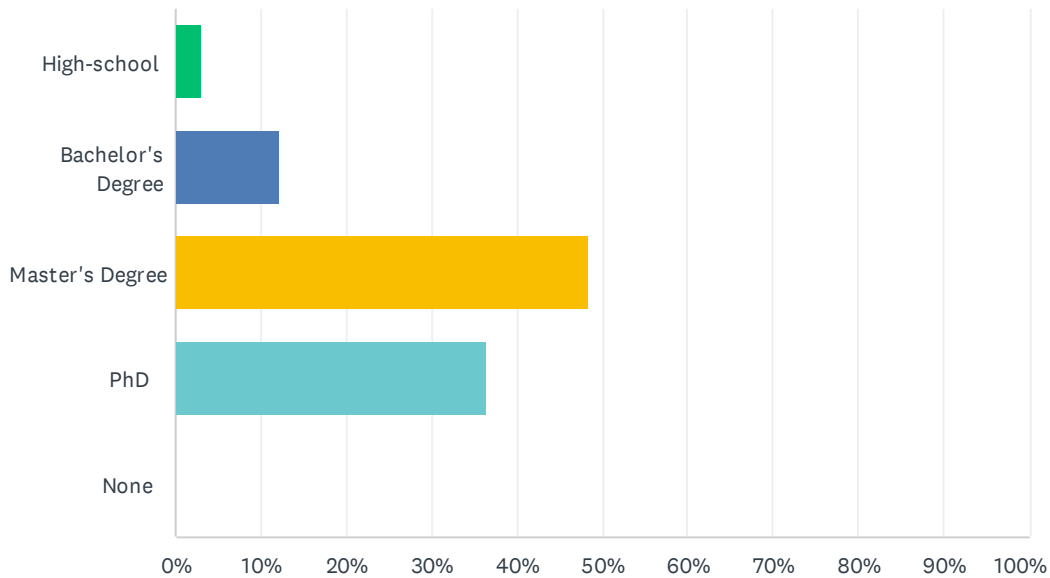

| ANSWER CHOICES    | RESPONSES |    |
|-------------------|-----------|----|
| High-school       | 3.03%     | 1  |
| Bachelor's Degree | 12.12%    | 4  |
| Master's Degree   | 48.48%    | 16 |
| PhD               | 36.36%    | 12 |
| None              | 0.00%     | 0  |
| TOTAL             |           | 33 |

## Q25 What did you major in?

Answered: 33 Skipped: 3

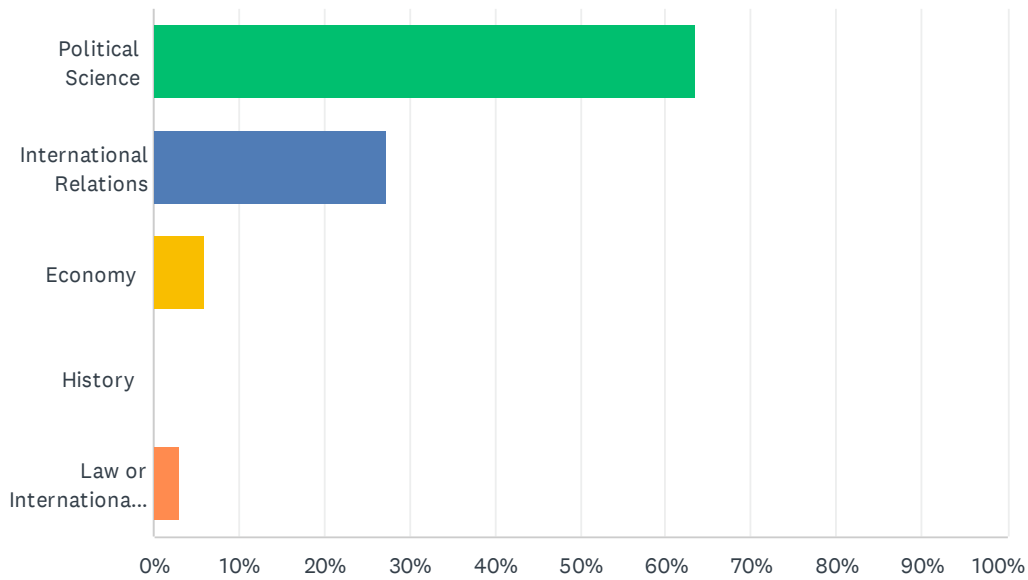

| ANSWER CHOICES           | RESPONSES |    |
|--------------------------|-----------|----|
| Political Science        | 63.64%    | 21 |
| International Relations  | 27.27%    | 9  |
| Economy                  | 6.06%     | 2  |
| History                  | 0.00%     | 0  |
| Law or International Law | 3.03%     | 1  |
| TOTAL                    |           | 33 |

Q26 How would you rate your English proficiency?

Answered: 33    Skipped: 3

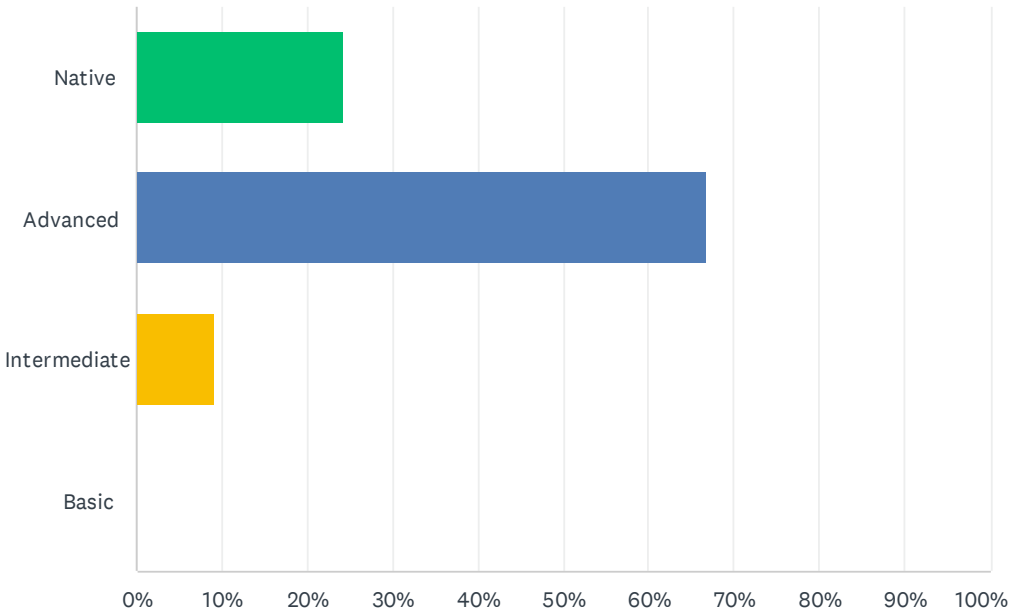

| ANSWER CHOICES | RESPONSES |    |
|----------------|-----------|----|
| Native         | 24.24%    | 8  |
| Advanced       | 66.67%    | 22 |
| Intermediate   | 9.09%     | 3  |
| Basic          | 0.00%     | 0  |
| TOTAL          |           | 33 |

## Q27 Which of these describe you?

Answered: 33 Skipped: 3

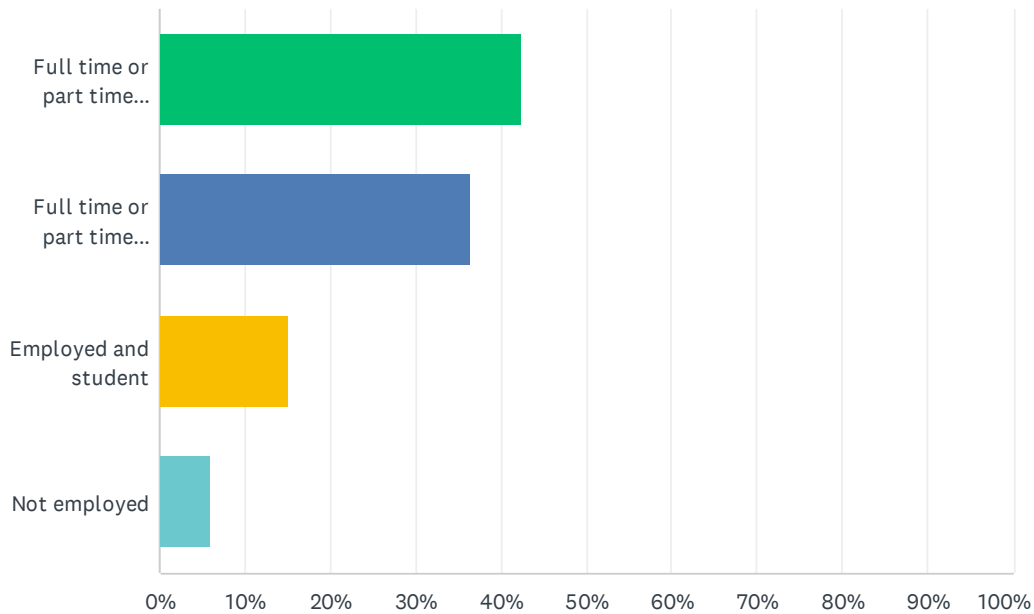

| ANSWER CHOICES                  | RESPONSES |    |
|---------------------------------|-----------|----|
| Full time or part time employed | 42.42%    | 14 |
| Full time or part time student  | 36.36%    | 12 |
| Employed and student            | 15.15%    | 5  |
| Not employed                    | 6.06%     | 2  |
| TOTAL                           |           | 33 |

## Q28 Where are you currently employed?

Answered: 33 Skipped: 3

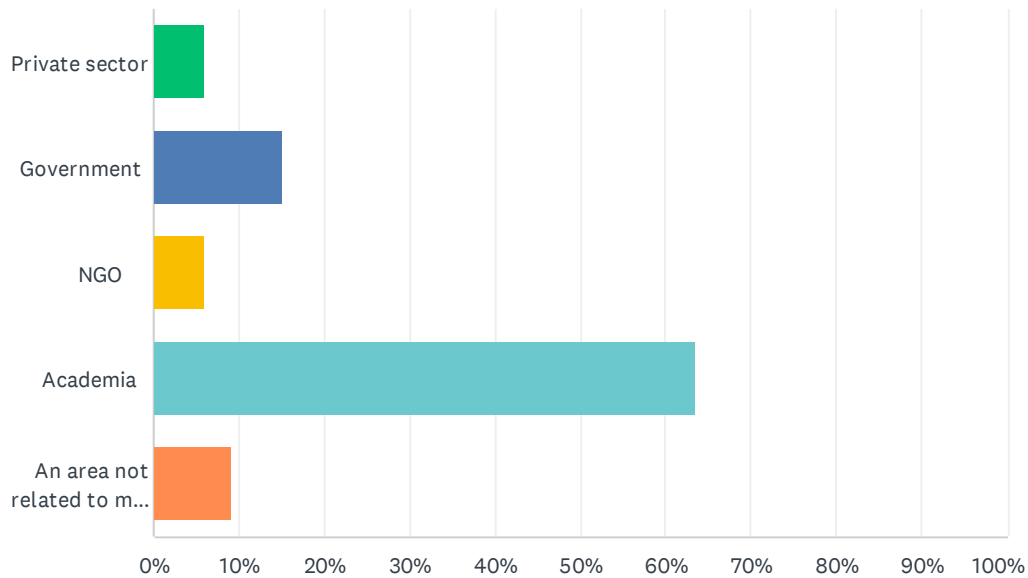

| ANSWER CHOICES                           | RESPONSES |    |
|------------------------------------------|-----------|----|
| Private sector                           | 6.06%     | 2  |
| Government                               | 15.15%    | 5  |
| NGO                                      | 6.06%     | 2  |
| Academia                                 | 63.64%    | 21 |
| An area not related to my field of study | 9.09%     | 3  |
| TOTAL                                    |           | 33 |

## Q29 How much is your household's income per year?

Answered: 33 Skipped: 3

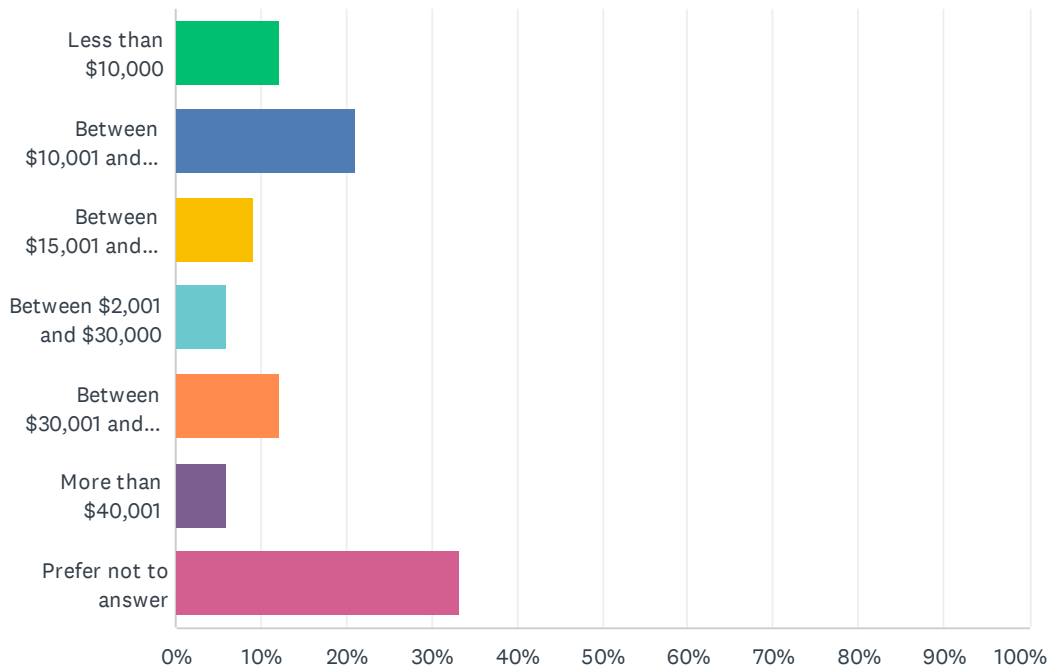

| ANSWER CHOICES                | RESPONSES |    |
|-------------------------------|-----------|----|
| Less than \$10,000            | 12.12%    | 4  |
| Between \$10,001 and \$15,000 | 21.21%    | 7  |
| Between \$15,001 and \$20,000 | 9.09%     | 3  |
| Between \$2,001 and \$30,000  | 6.06%     | 2  |
| Between \$30,001 and \$40,000 | 12.12%    | 4  |
| More than \$40,001            | 6.06%     | 2  |
| Prefer not to answer          | 33.33%    | 11 |
| TOTAL                         |           | 33 |

**Q30 Is there any other remarks that you would like to make regarding your  
experience with Politikon?**

Answered: 8   Skipped: 28
